# Supplementary material for: Hypoxia-inducible factor (HIF)-3a2 serves as an endothelial cell fate executor during chronic hypoxia
Source: PubMed Central journal article supplement (PMC8983852; doi:10.17179/excli2021-4622), 2022-02-21

**Original article:**

**HYPOXIA-INDUCIBLE FACTOR (HIF)-3 $\alpha$ 2 SERVES AS AN  
ENDOTHELIAL CELL FATE EXECUTOR DURING  
CHRONIC HYPOXIA**

Maciej Jaśkiewicz<sup>1</sup>, Adrianna Moszyńska<sup>1</sup>, Marcin Serocki<sup>1</sup>, Jarosław Króliczewski<sup>1</sup>,  
Sylwia Bartoszewska<sup>2</sup>, James F. Collawn<sup>3</sup>, Rafal Bartoszewski<sup>1\*</sup>

<sup>1</sup> Department of Biology and Pharmaceutical Botany, Medical University of Gdansk, Gdansk, Poland

<sup>2</sup> Department of Inorganic Chemistry, Medical University of Gdansk, Gdansk, Poland

<sup>3</sup> Department of Cell, Developmental and Integrative Biology, University of Alabama at Birmingham, Birmingham, USA, Birmingham, AL 35233

\* **Corresponding author:** Rafal Bartoszewski, Department of Biology and Pharmaceutical Botany, Medical University of Gdansk, al. Gen. J. Hallera 107, 80-416 Gdansk, Poland; Tel: 48 58 349 32 14; Fax: 48 58 349 32 11; E-mail: [rafalbar@gumed.edu.pl](mailto:rafalbar@gumed.edu.pl)

<https://dx.doi.org/10.17179/excli2021-4622>

This is an Open Access article distributed under the terms of the Creative Commons Attribution License (<http://creativecommons.org/licenses/by/4.0/>).

Raw data for Figure 1

# HUVEC

## Replicate 1

HIF-3 $\alpha$ 2

0

Hypoxia (hours)

48

[other samples ]

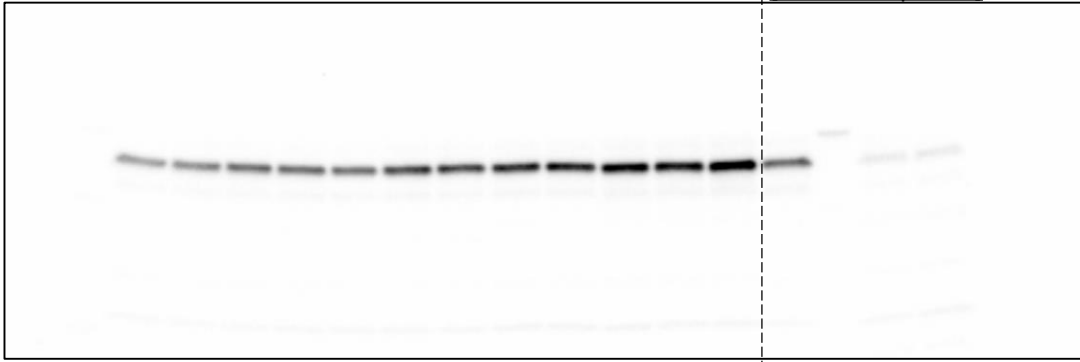

Actin  $\beta$

0

Hypoxia (hours)

48

[other samples ]

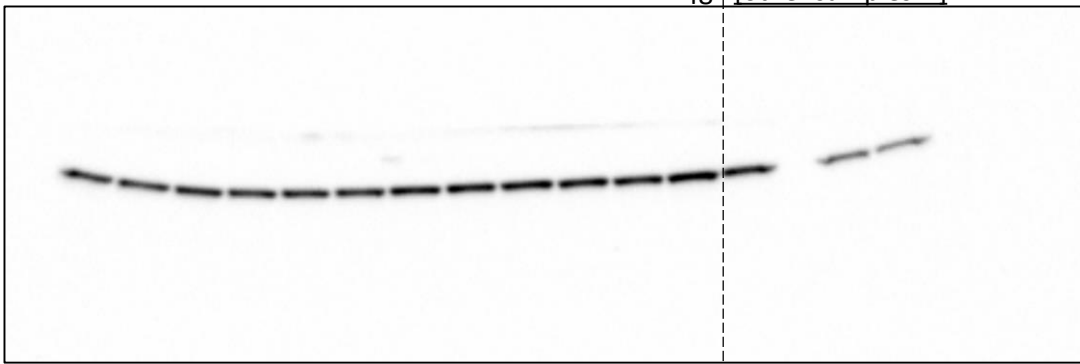

Total Protein

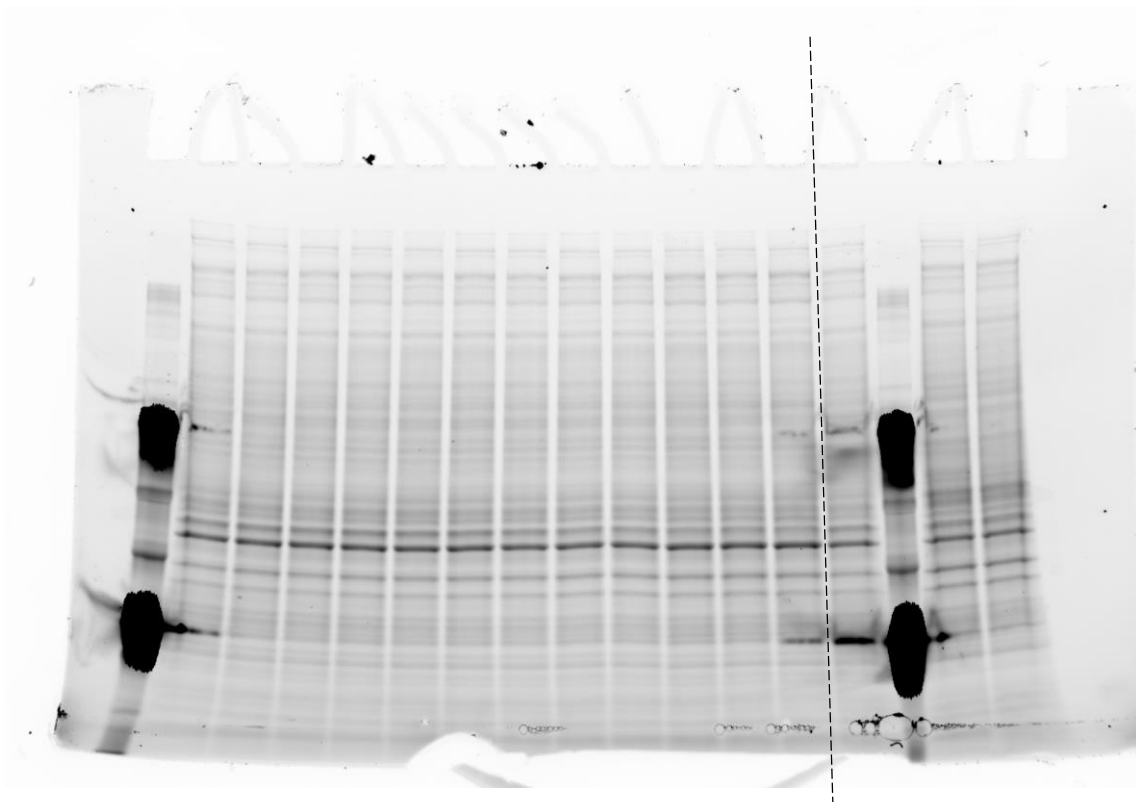

# HUVEC

## Replicate 2

HIF-3 $\alpha$ 2

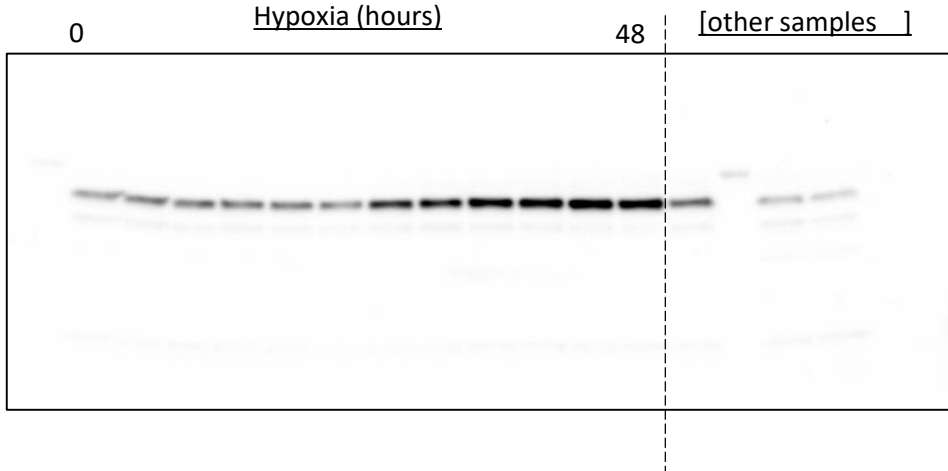

Actin  $\beta$

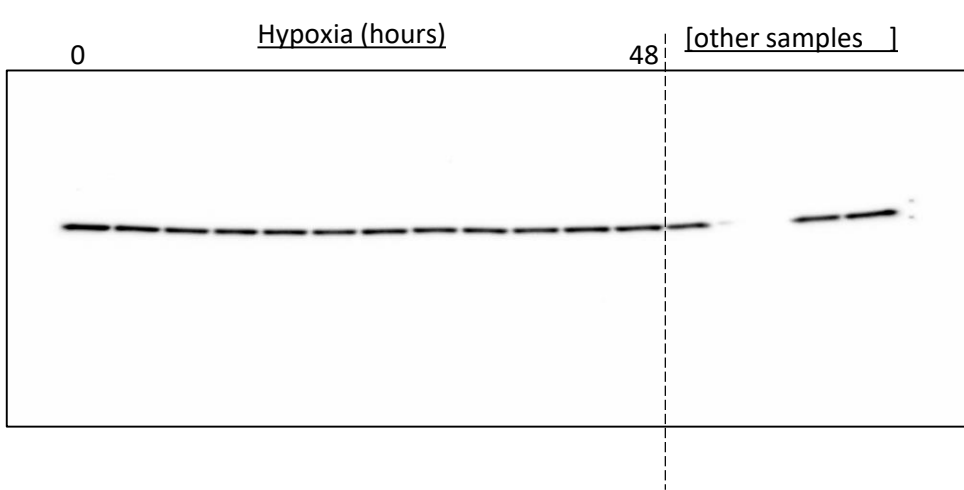

# HUVEC

## Replicate 3

HIF-3 $\alpha$ 2

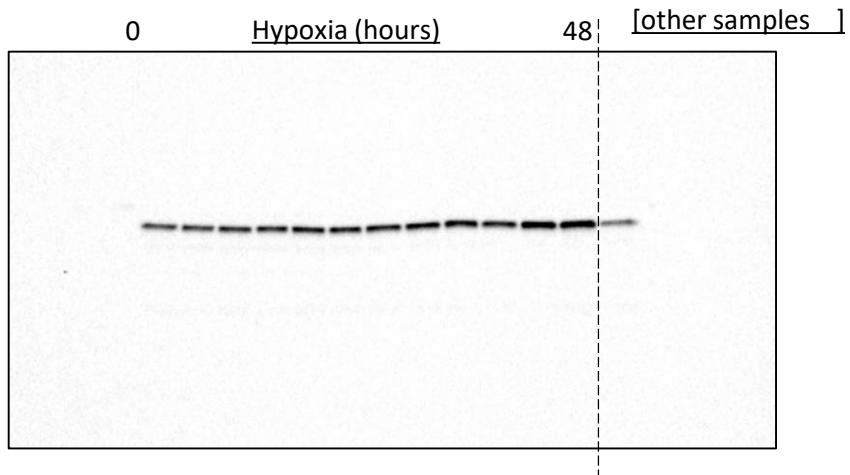

Actin  $\beta$

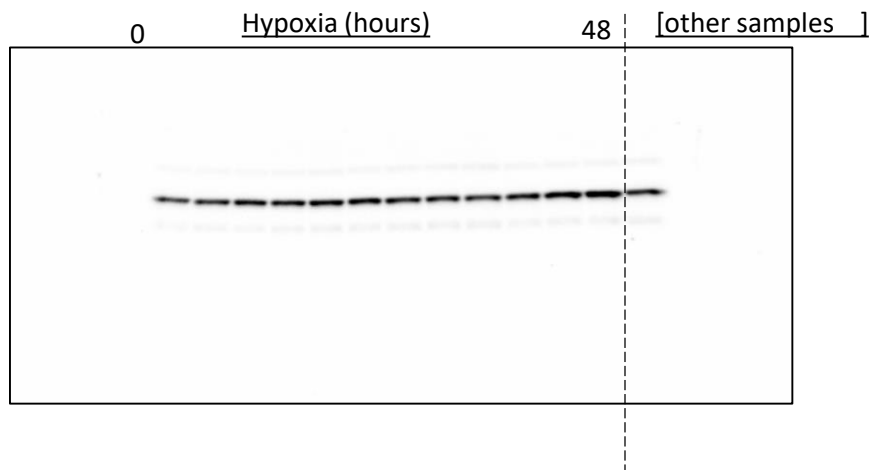

Total Protein

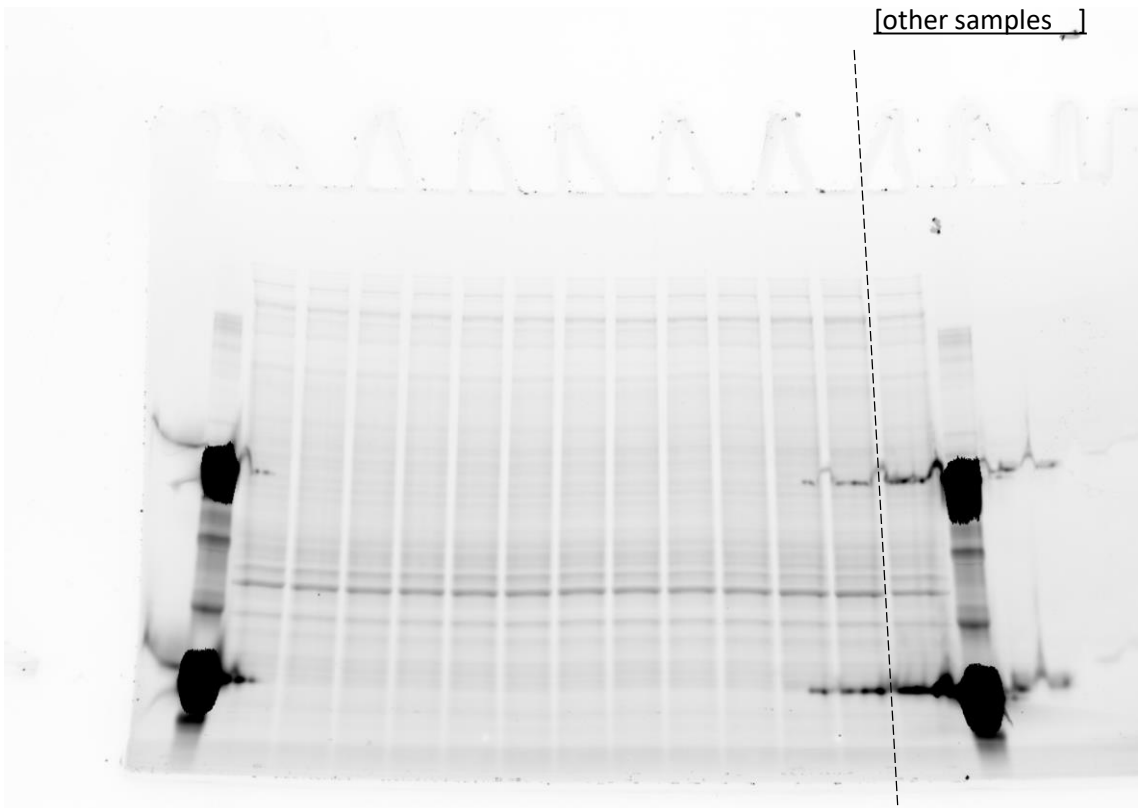

# UtMVEC

Replicate 1

HIF-3 $\alpha$ 2

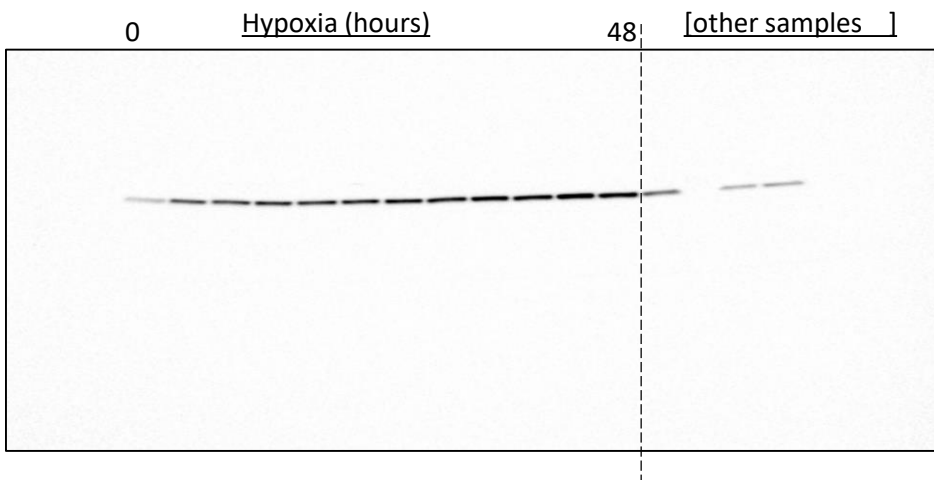

Total Protein

Hypoxia (hours)

[other samples ]

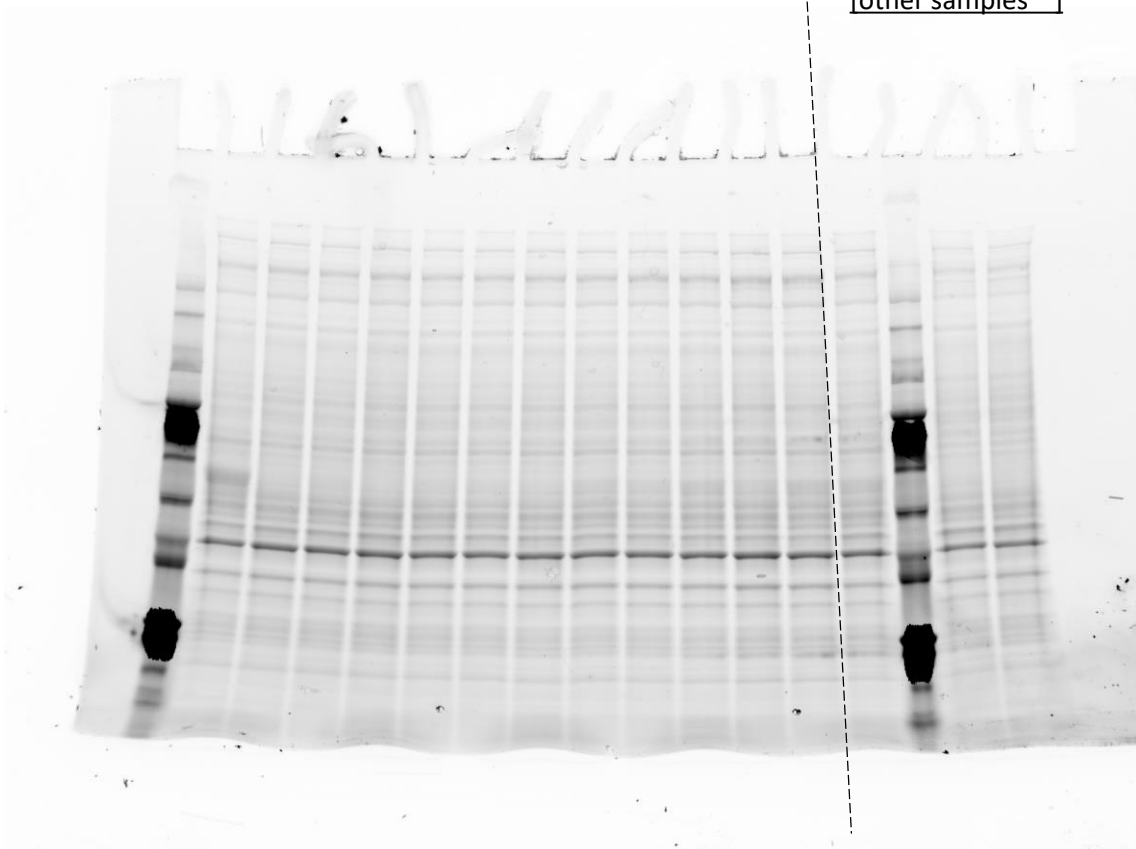

# UtMVEC

Replicate 2

HIF-3 $\alpha$ 2

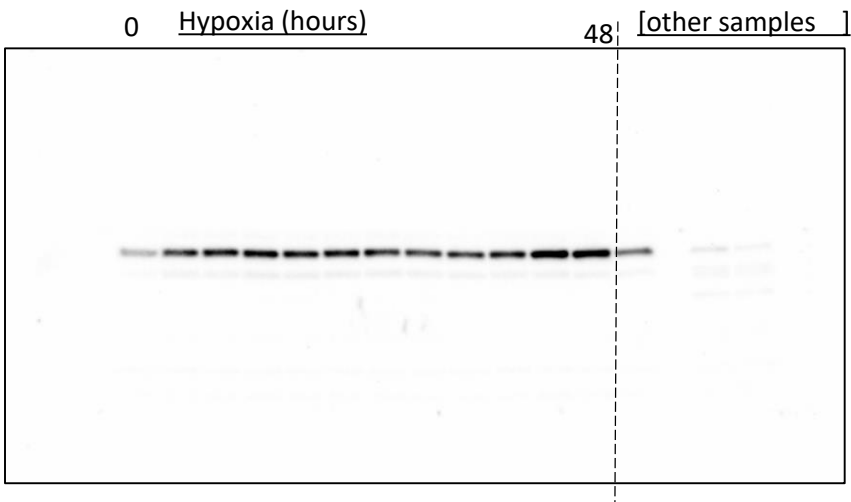

Total Protein

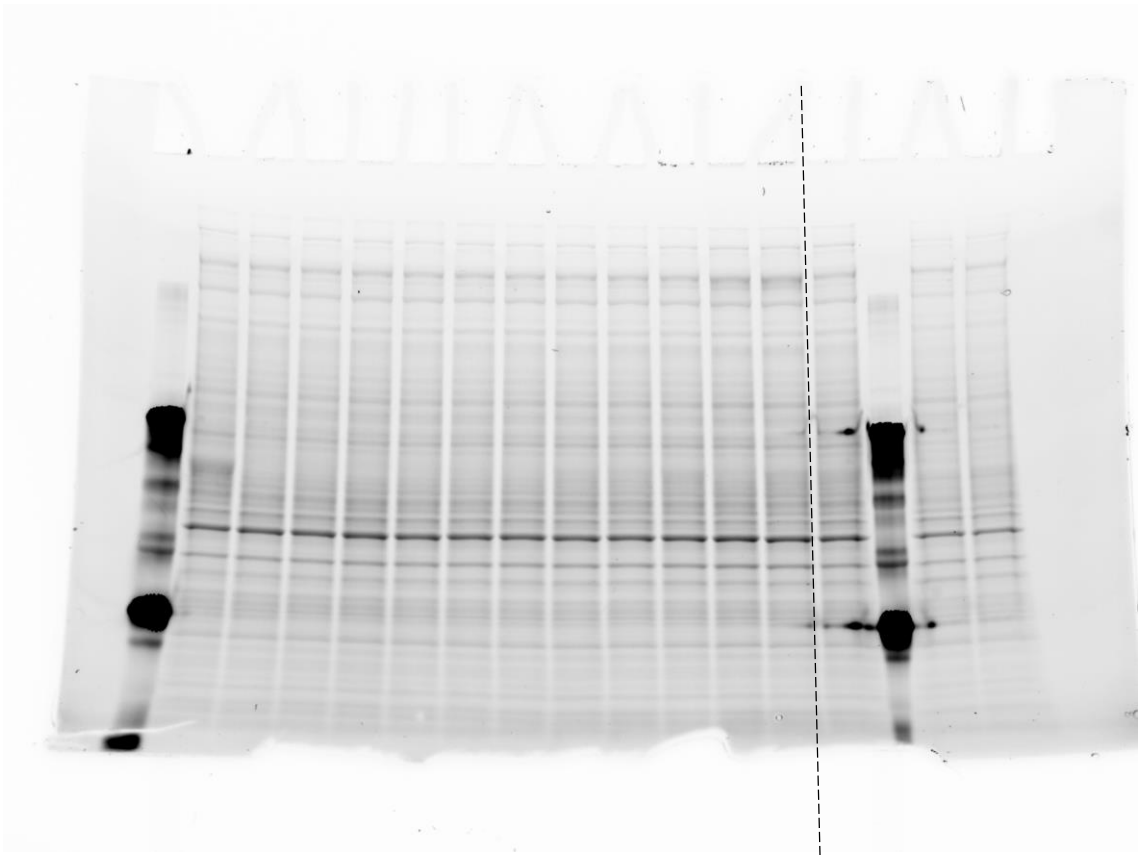

# UtMVEC

## Replicate 3

HIF-3 $\alpha$ 2

0

Hypoxia (hours)

48

[other samples ]

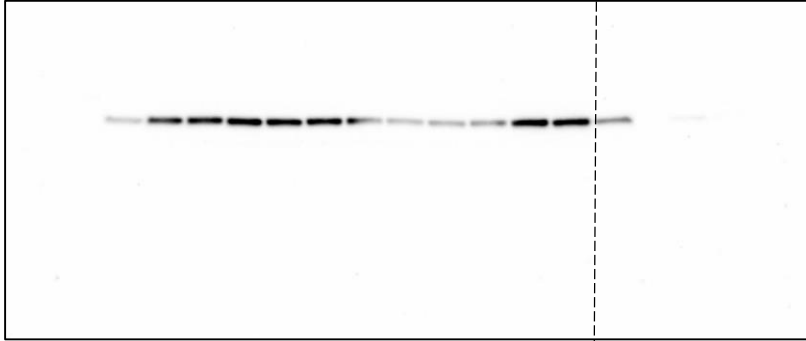

Actin  $\beta$

0

Hypoxia (hours)

48

[other samples ]

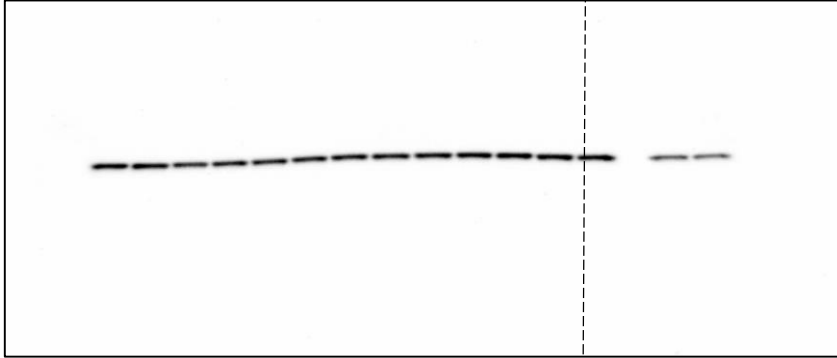

Total Protein

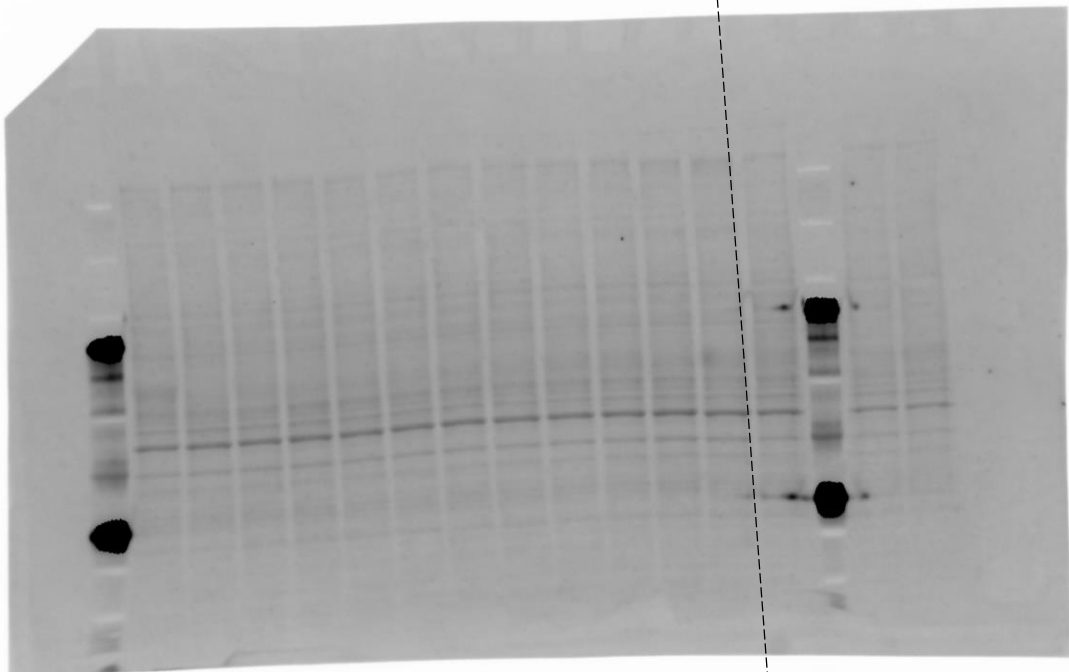

# HPAEC

## Replicate 1

HIF-3 $\alpha$ 2

0

Hypoxia (hours)

48

[other samples ]

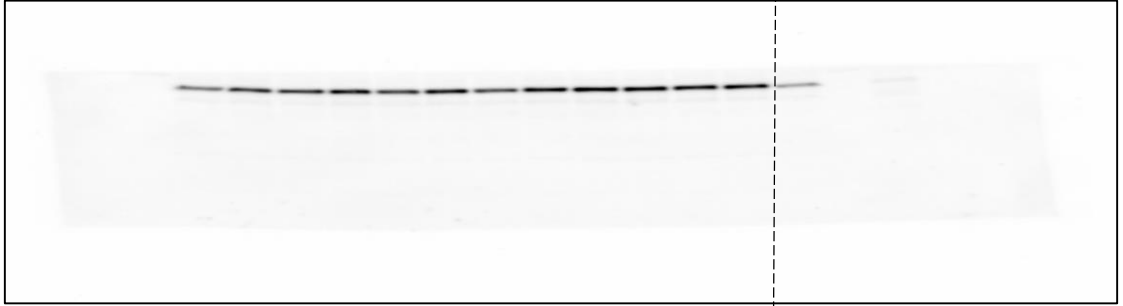

Actin  $\beta$

0

Hypoxia (hours)

48

[other samples ]

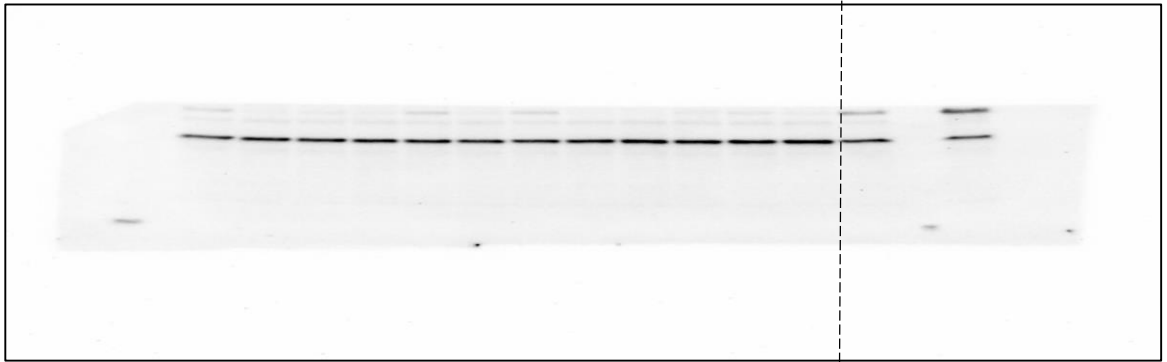

Total Protein

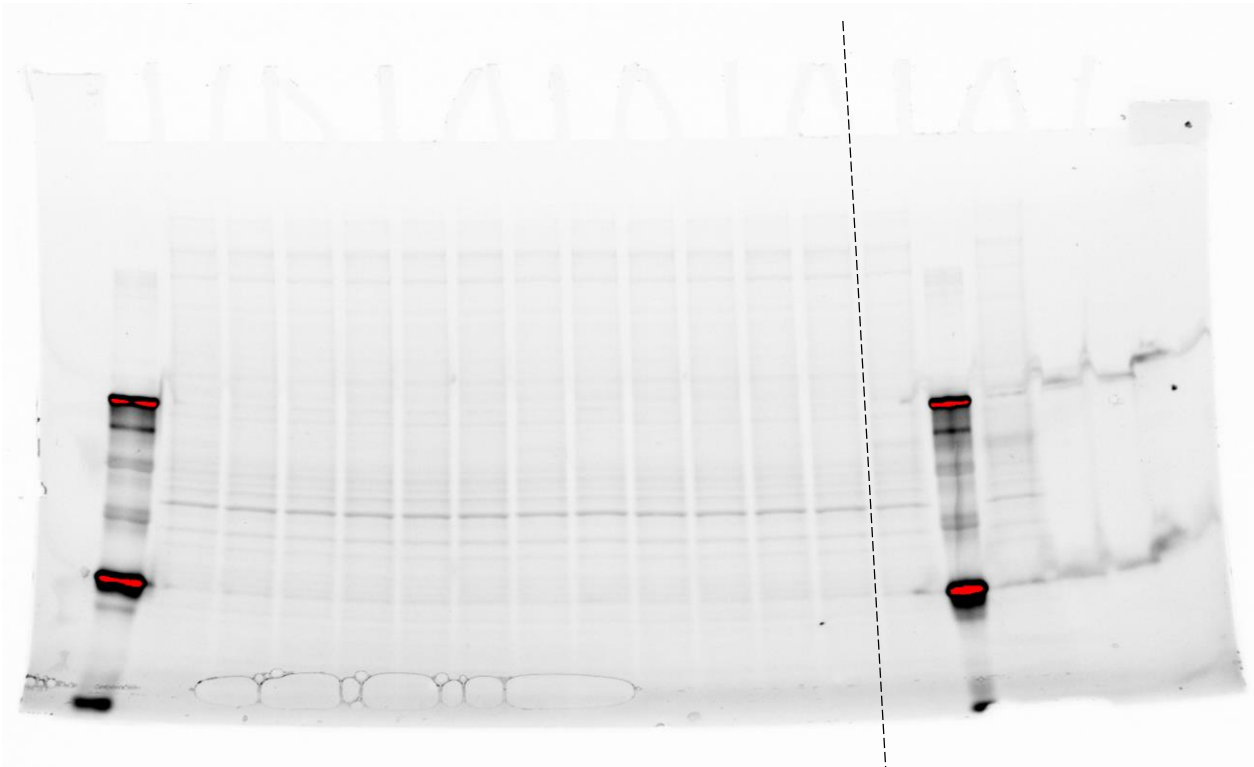



# HPAEC

Replicate 2

HIF-3 $\alpha$ 2

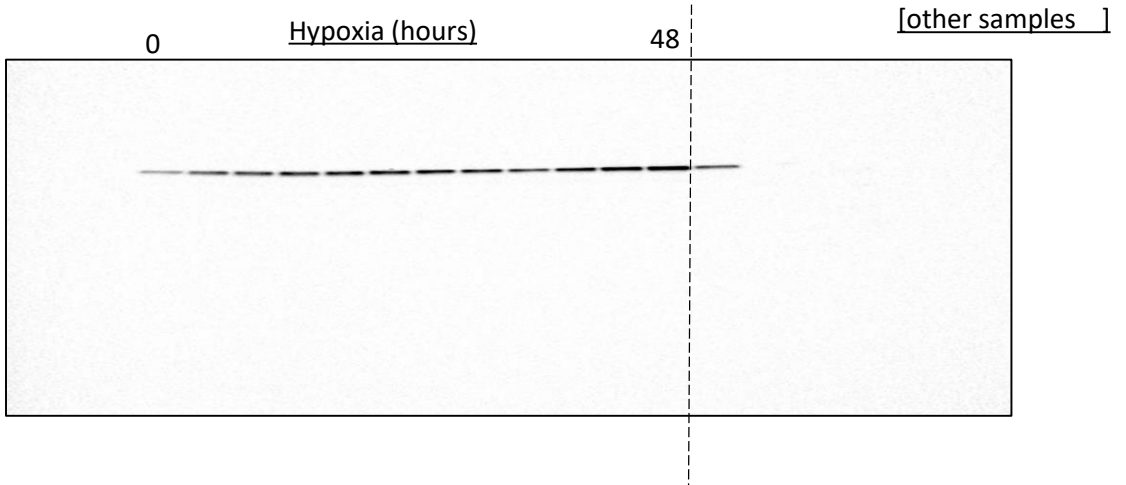

Actin  $\beta$

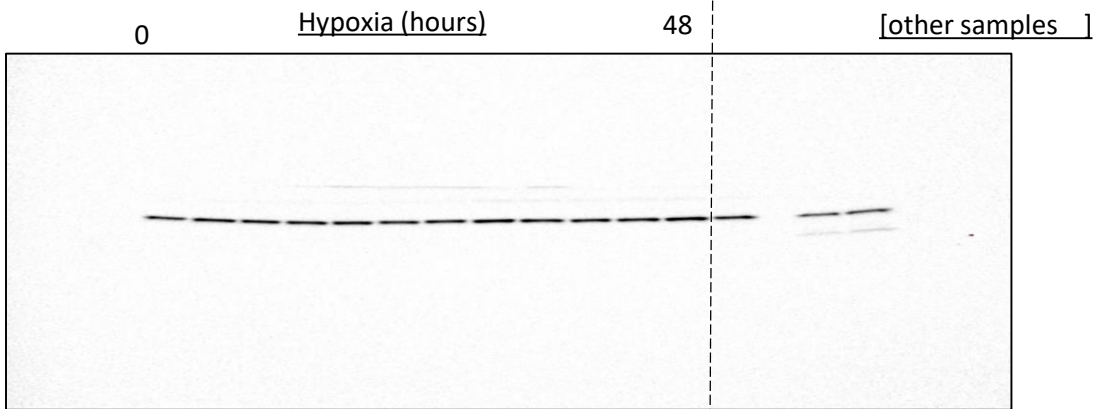

Total Protein

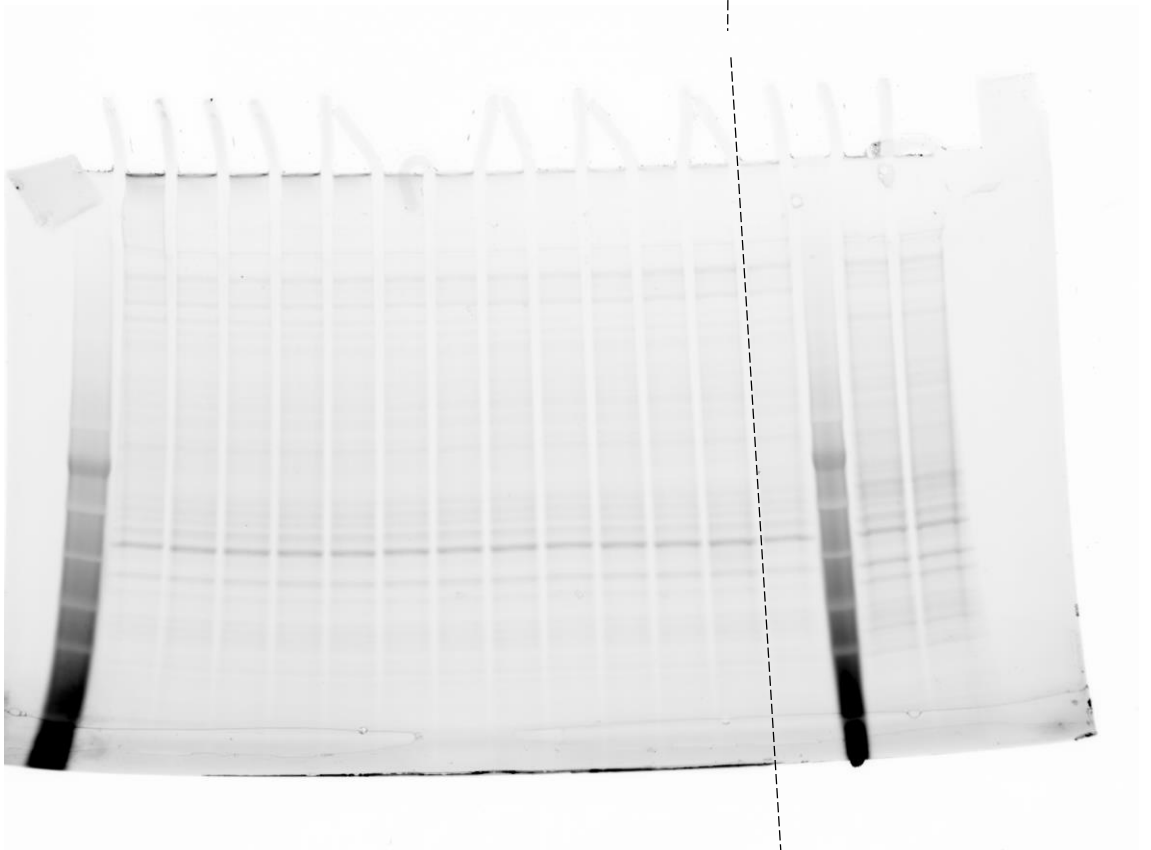

# HPAEC

## Replicate 3

HIF-3 $\alpha$ 2

0

Hypoxia (hours)

48

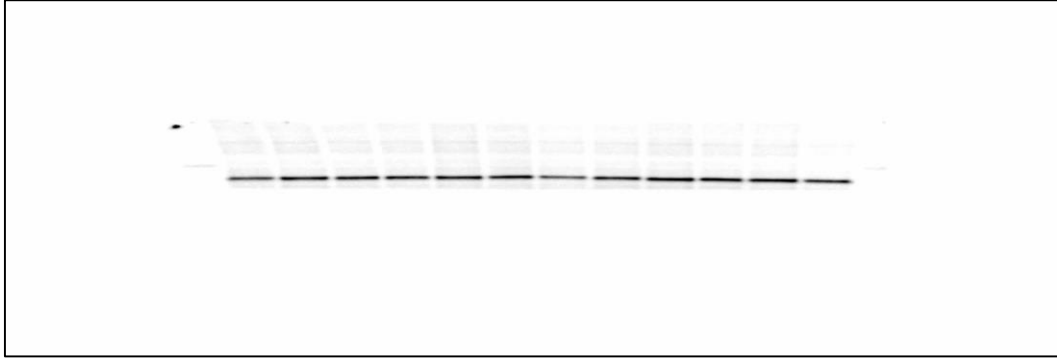

Actin  $\beta$

0

Hypoxia (hours)

48

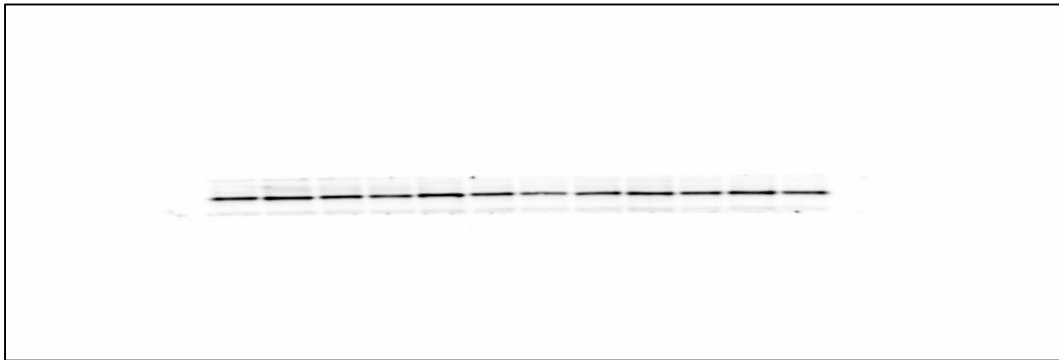

Total Protein

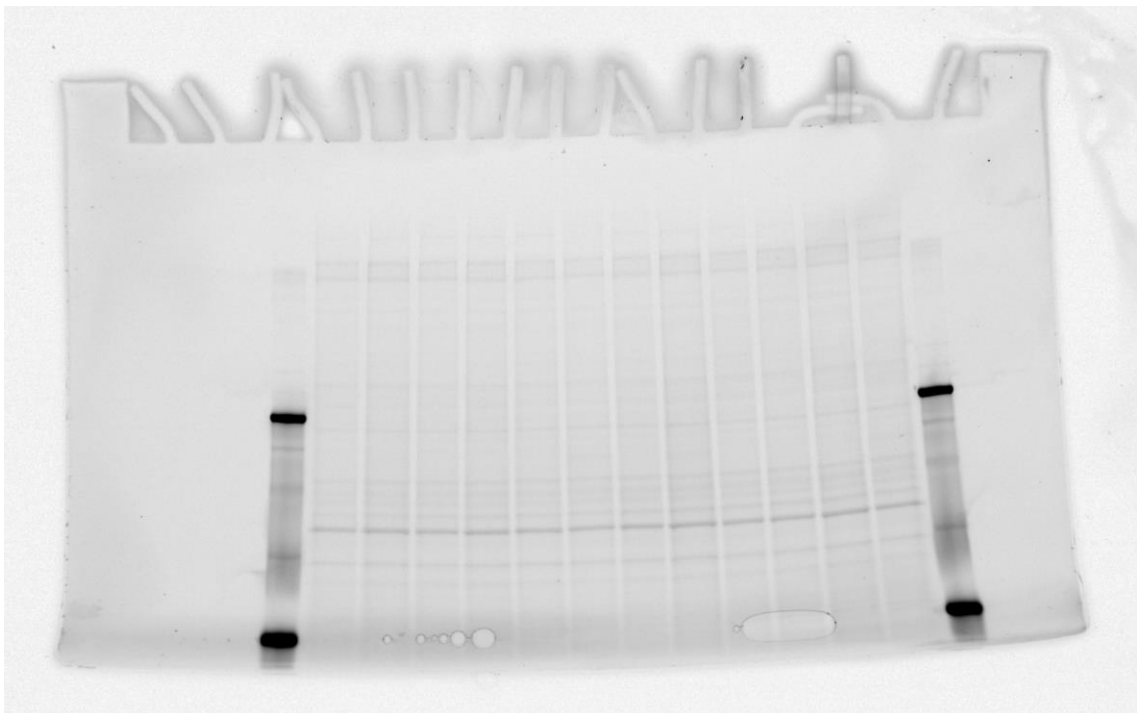

# HCAEC

Replicate 1

HIF-3 $\alpha$ 2

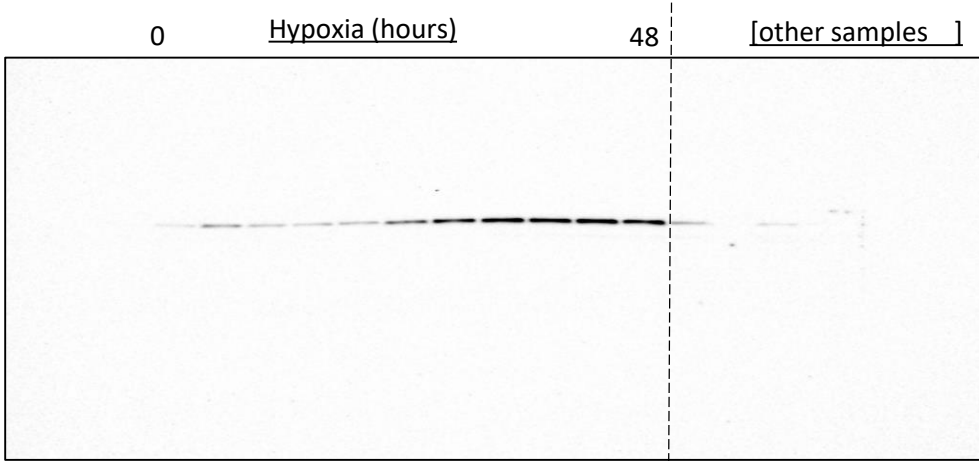

Actin  $\beta$

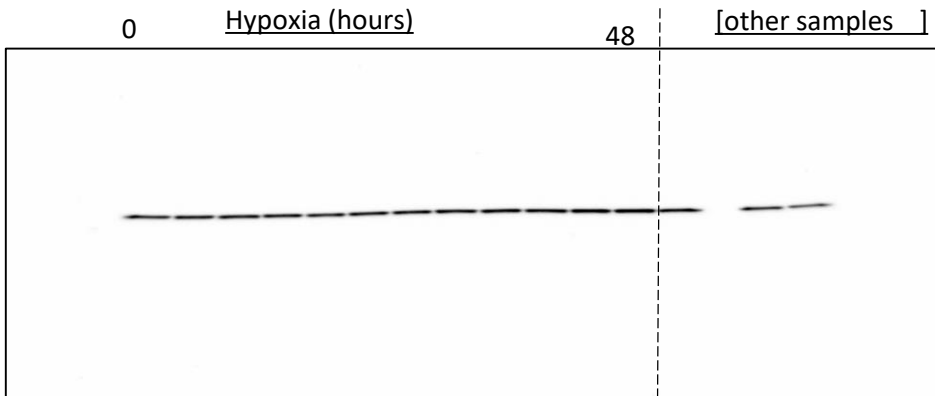

Total Protein

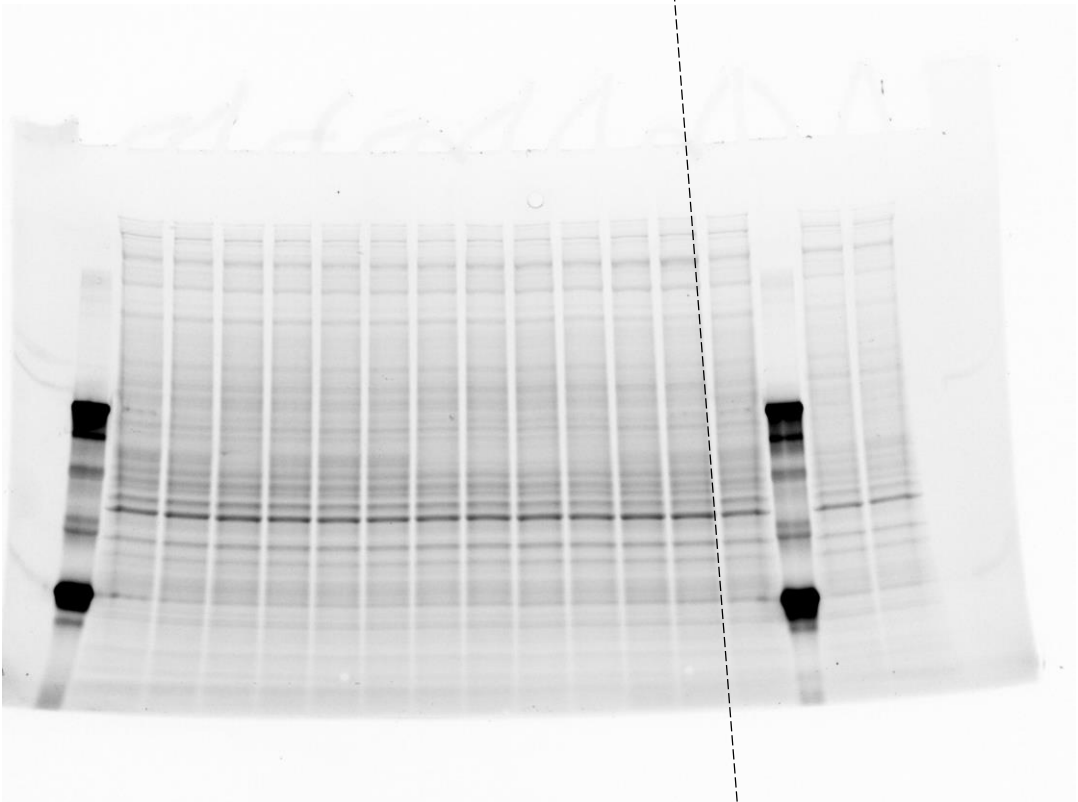

# HCAEC

## Replicate 2

HIF-3 $\alpha$ 2

0

Hypoxia (hours)

48

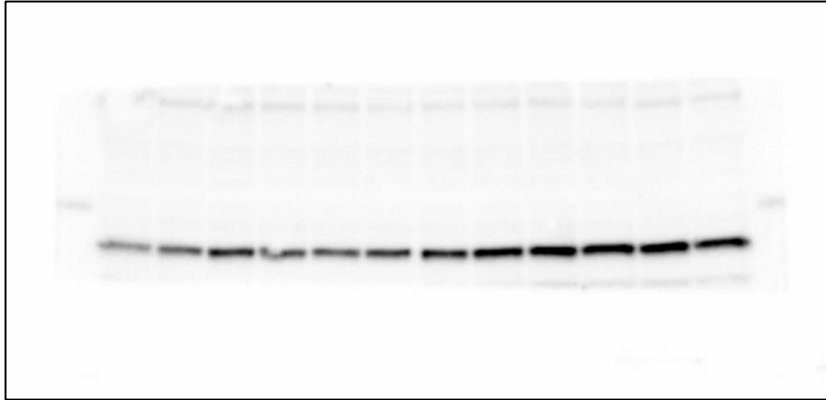

Actin  $\beta$

0

Hypoxia (hours)

48

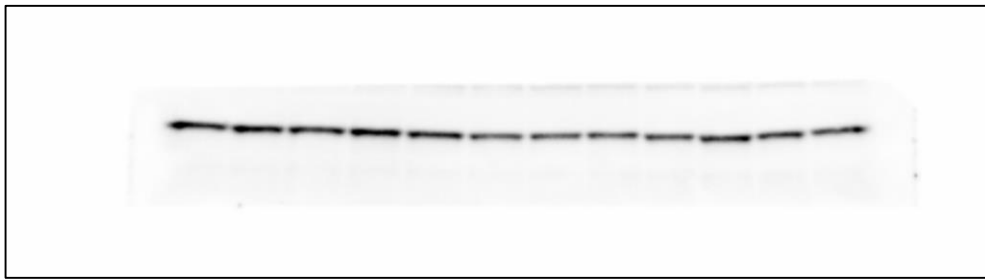

Total Protein

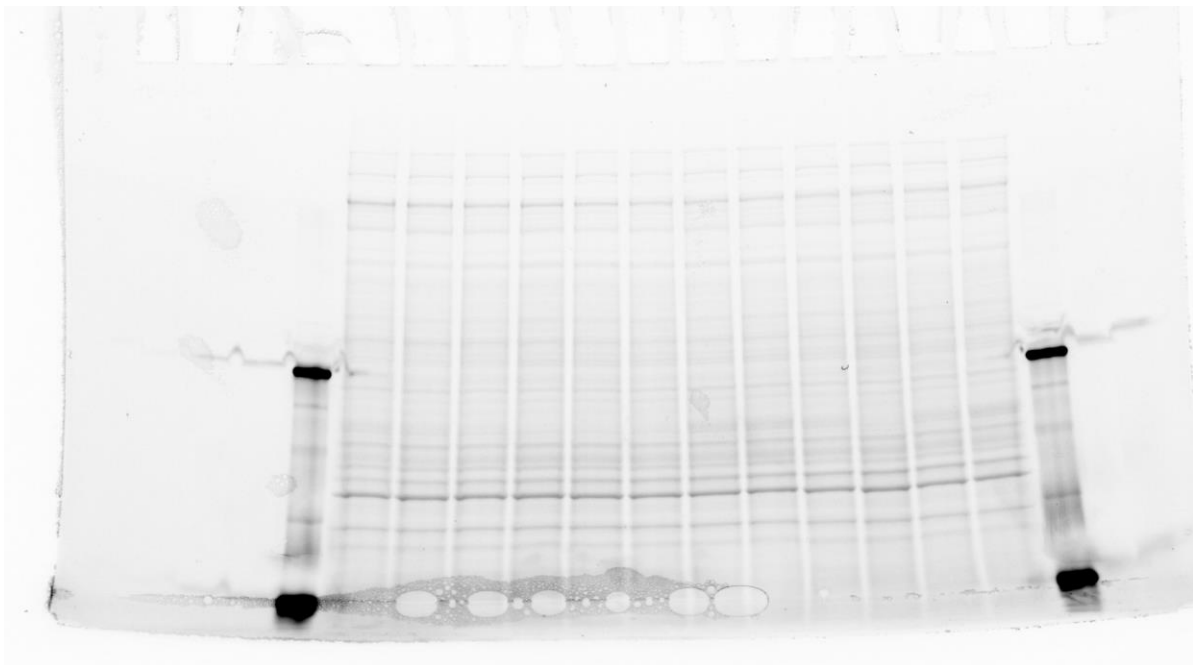

# HCAEC

## Replicate 3

HIF-3 $\alpha$ 2

0

Hypoxia (hours)

48

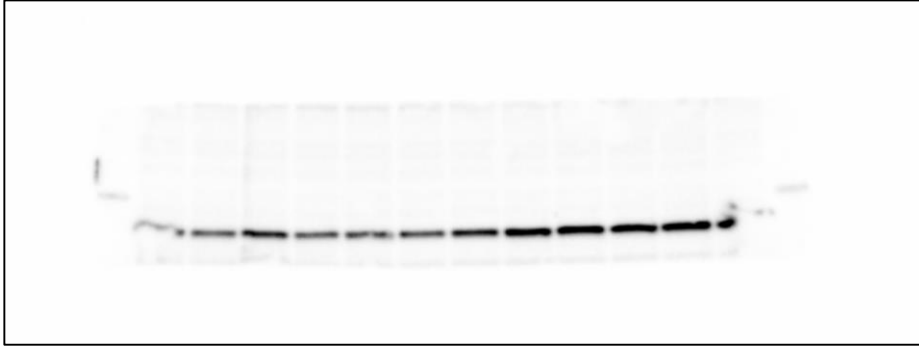

Actin  $\beta$

0

Hypoxia (hours)

48

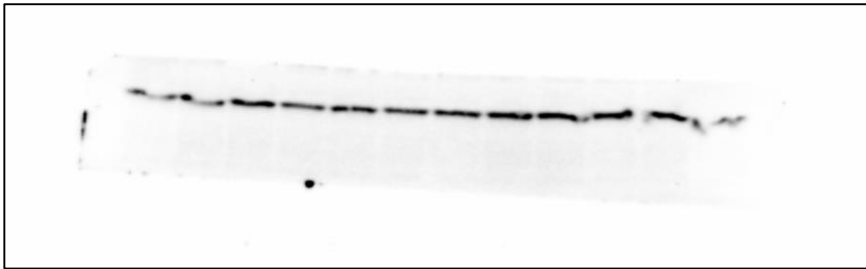

Total Protein

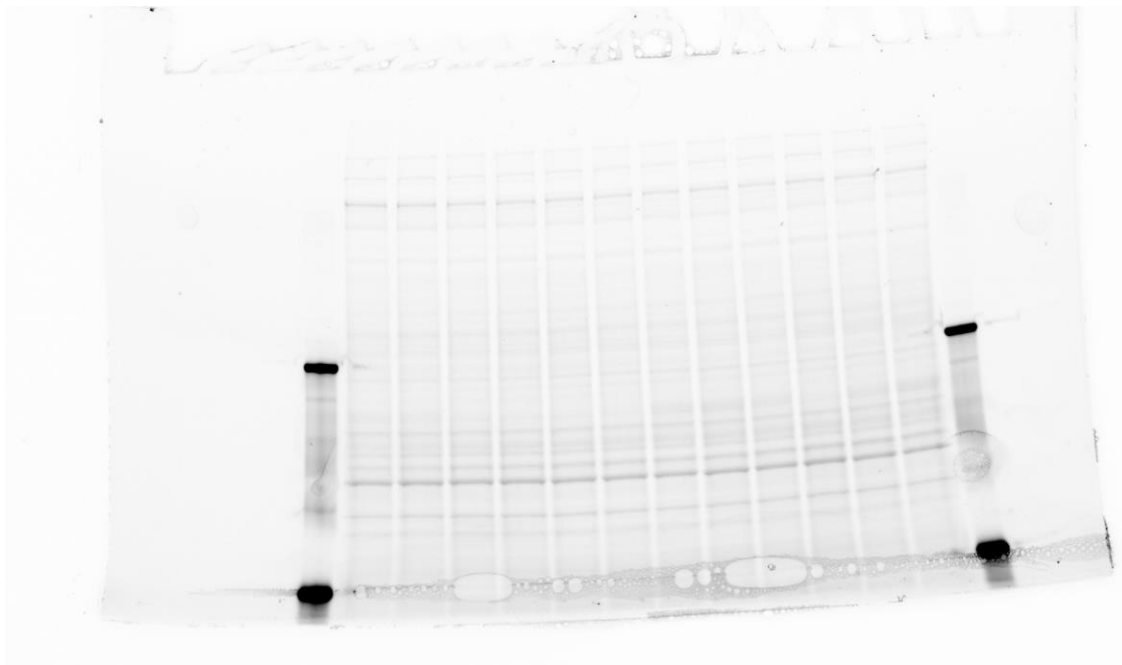

# HIAEC

Replicate 1

HIF-3 $\alpha$ 2

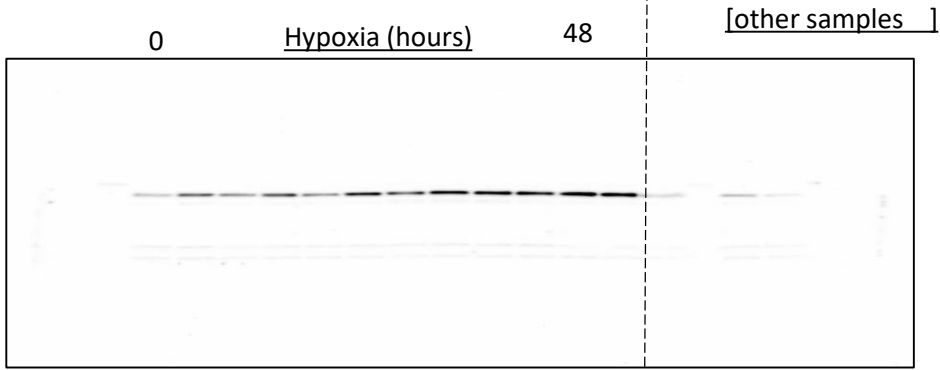

Actin  $\beta$

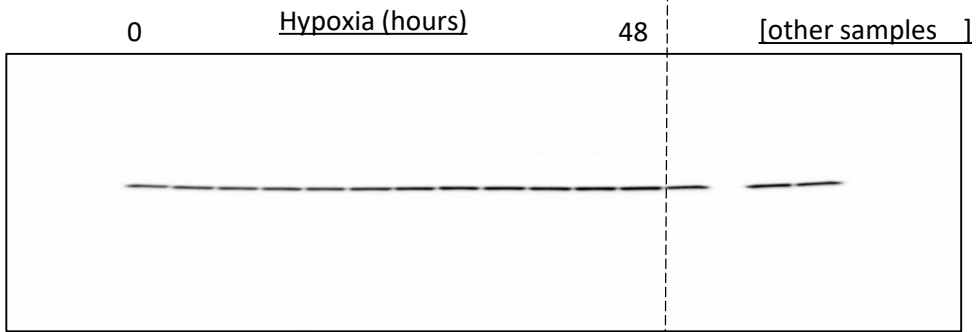

Total Protein

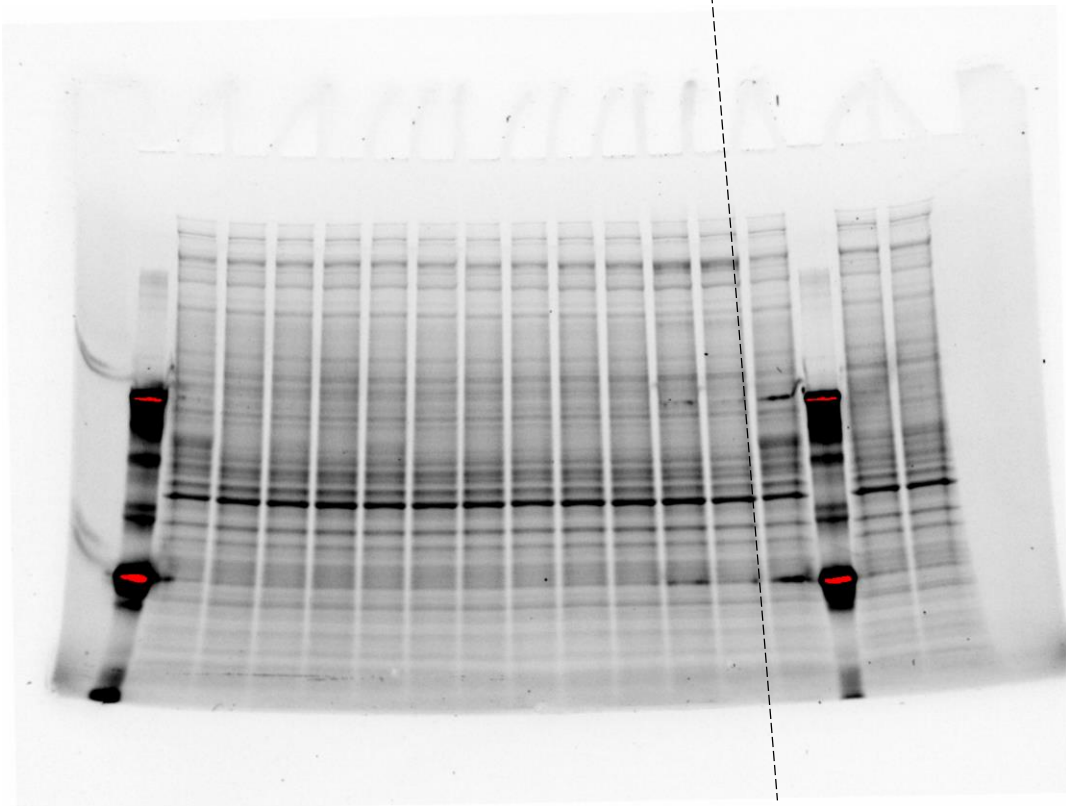

# HIAEC

Replicate 2

HIF-3 $\alpha$ 2

0 Hypoxia (hours) 48

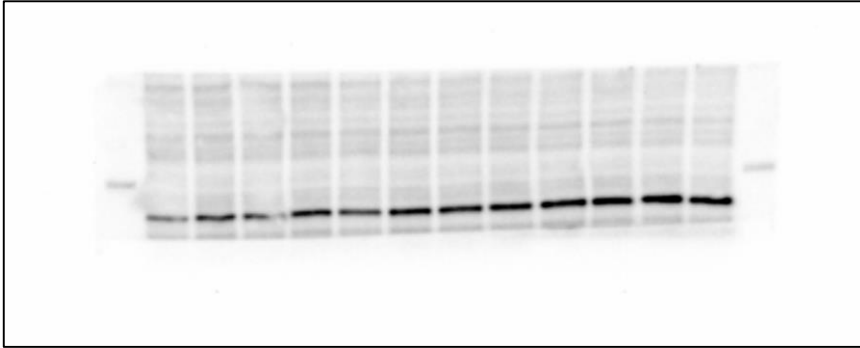

Actin  $\beta$

0 Hypoxia (hours) 48

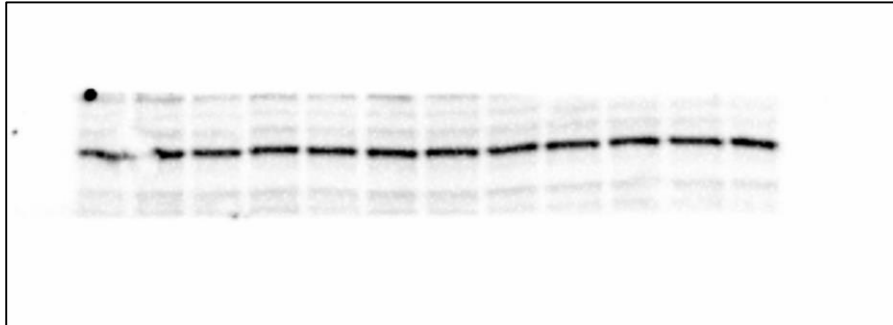

Total Protein

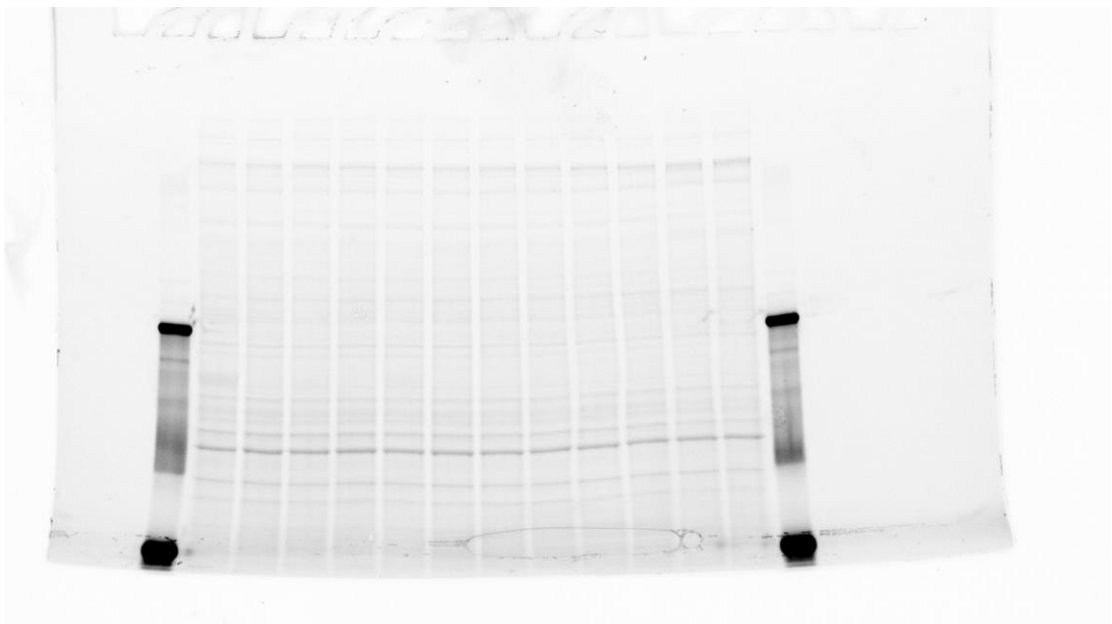

# HIAEC

Replicate 3

HIF-3 $\alpha$ 2

0 Hypoxia (hours) 48

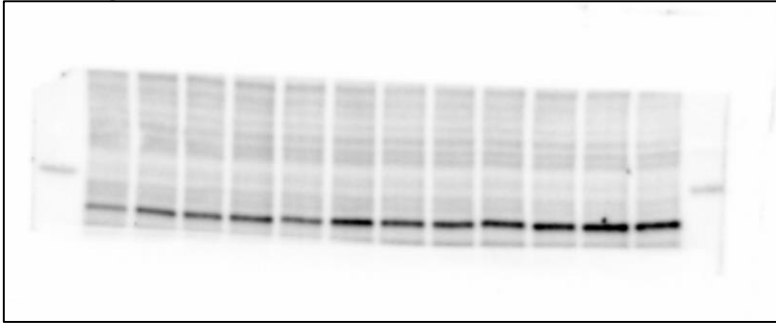

Actin  $\beta$

0 Hypoxia (hours) 48

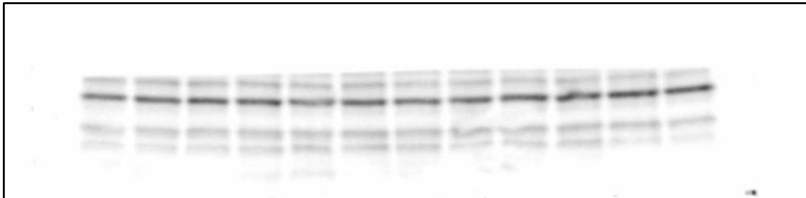

Total Protein

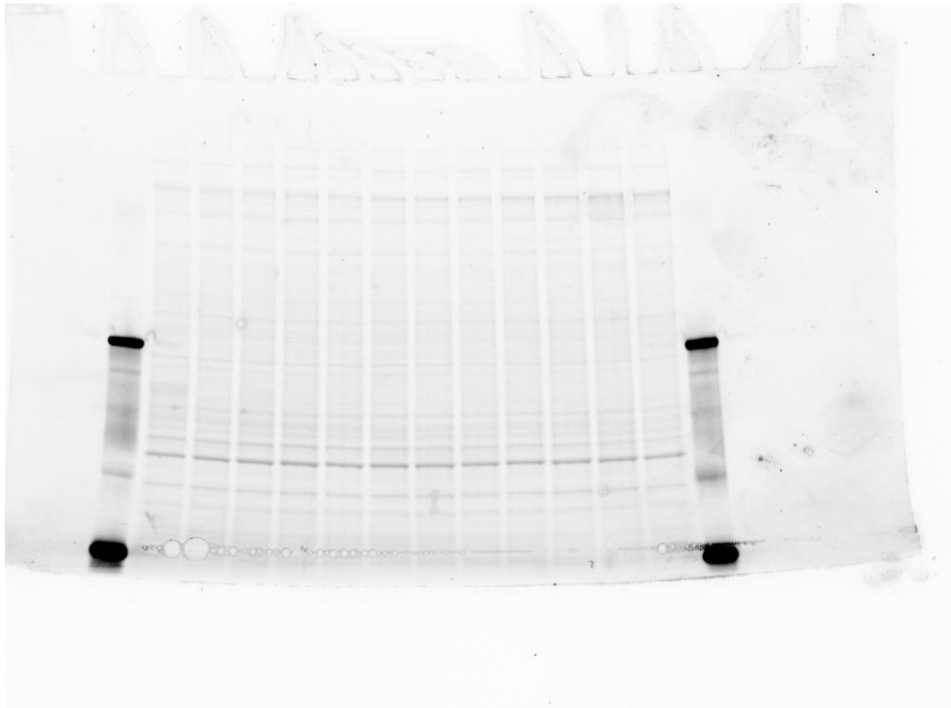



# HPASMC

Replicate 1

HIF-3 $\alpha$ 2

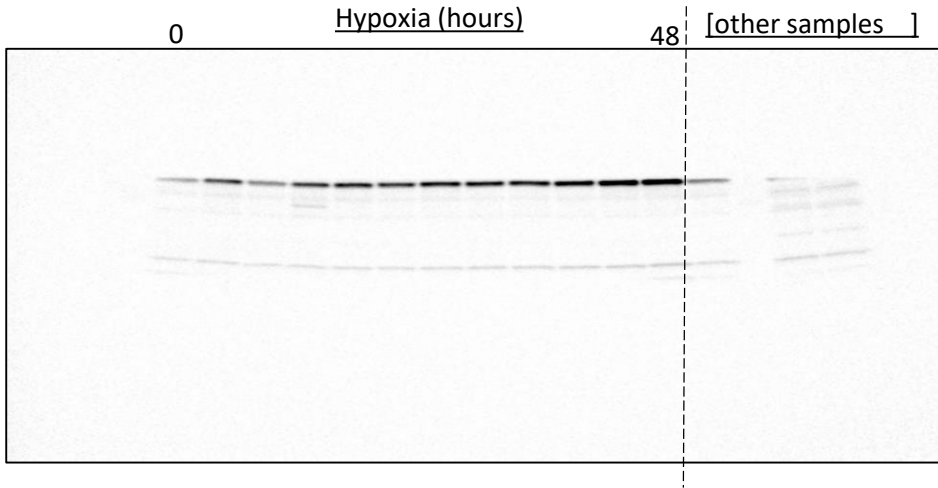

Total Protein

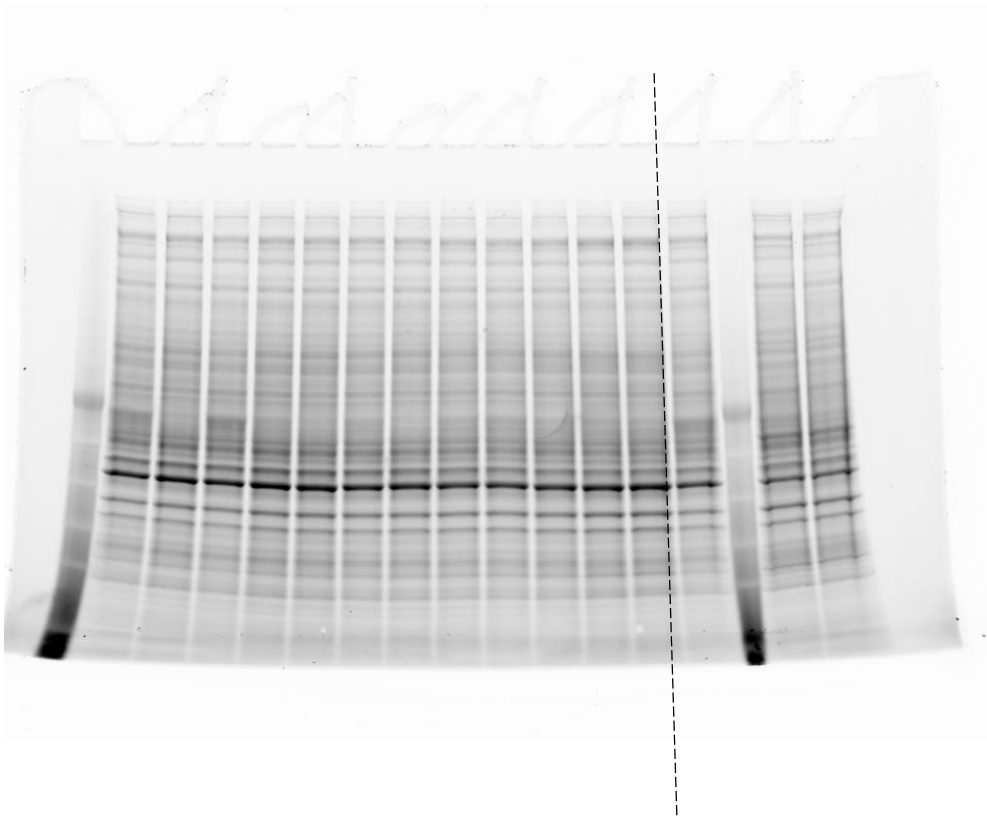

# HPASMC

Replicate 2

HIF-3 $\alpha$ 2

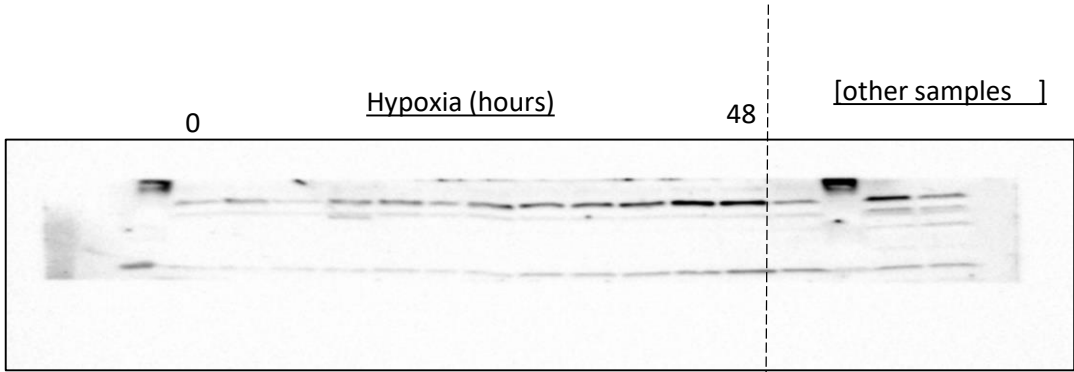

Actin  $\beta$

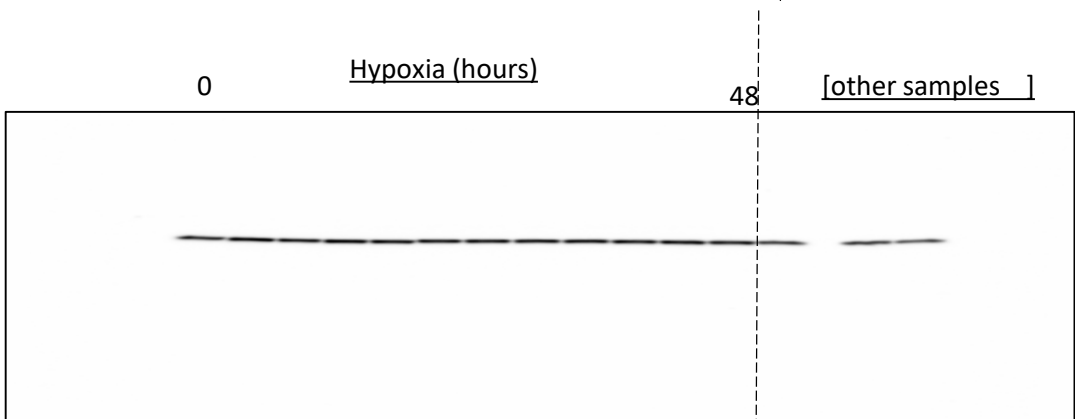

Total Protein

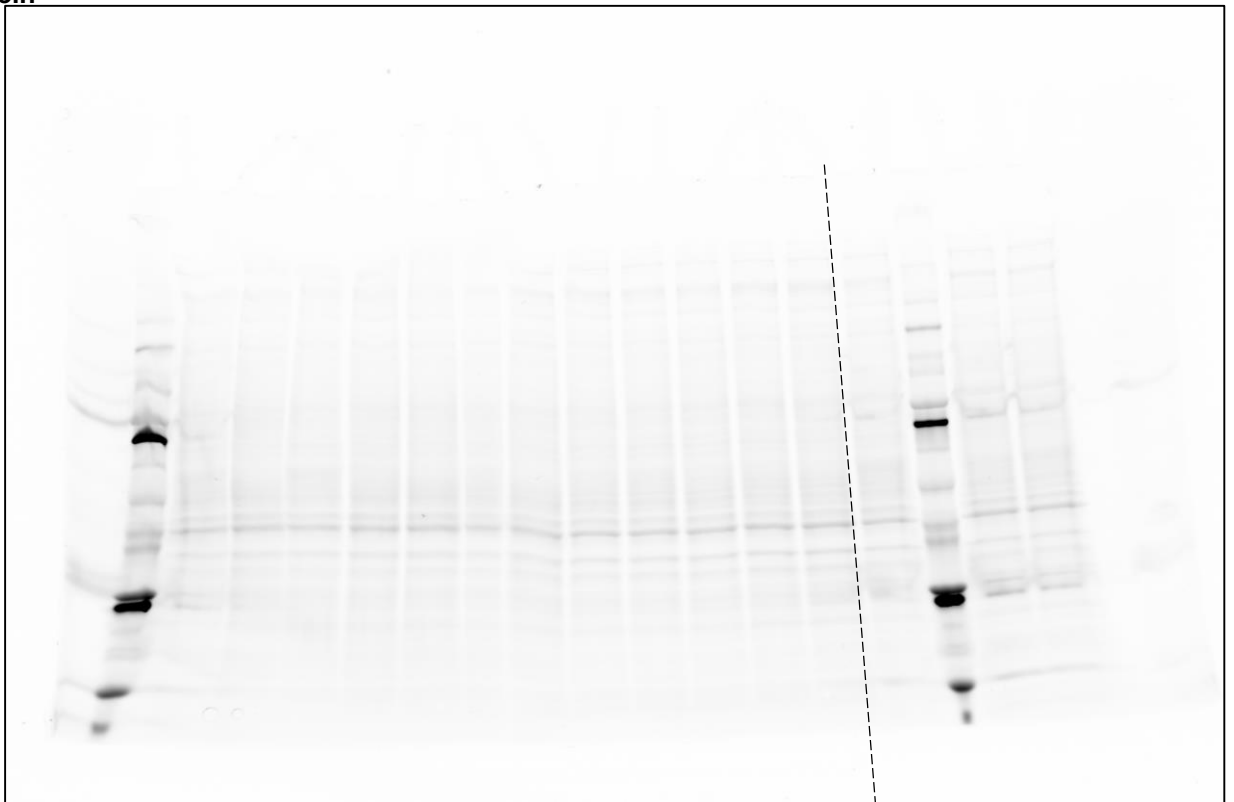

# HPASMC

Replicate 3

HIF-3 $\alpha$ 2

0

Hypoxia (hours)

48

[other samples ]

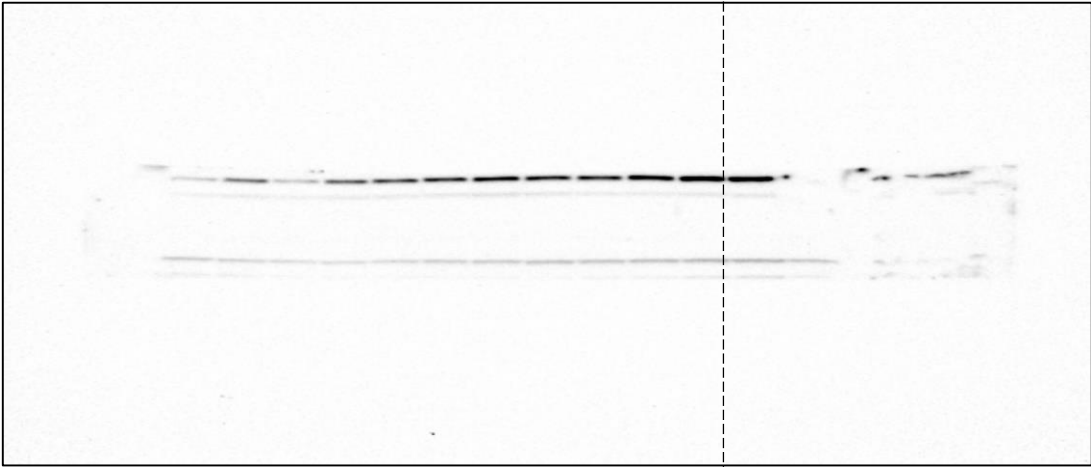

Total Protein

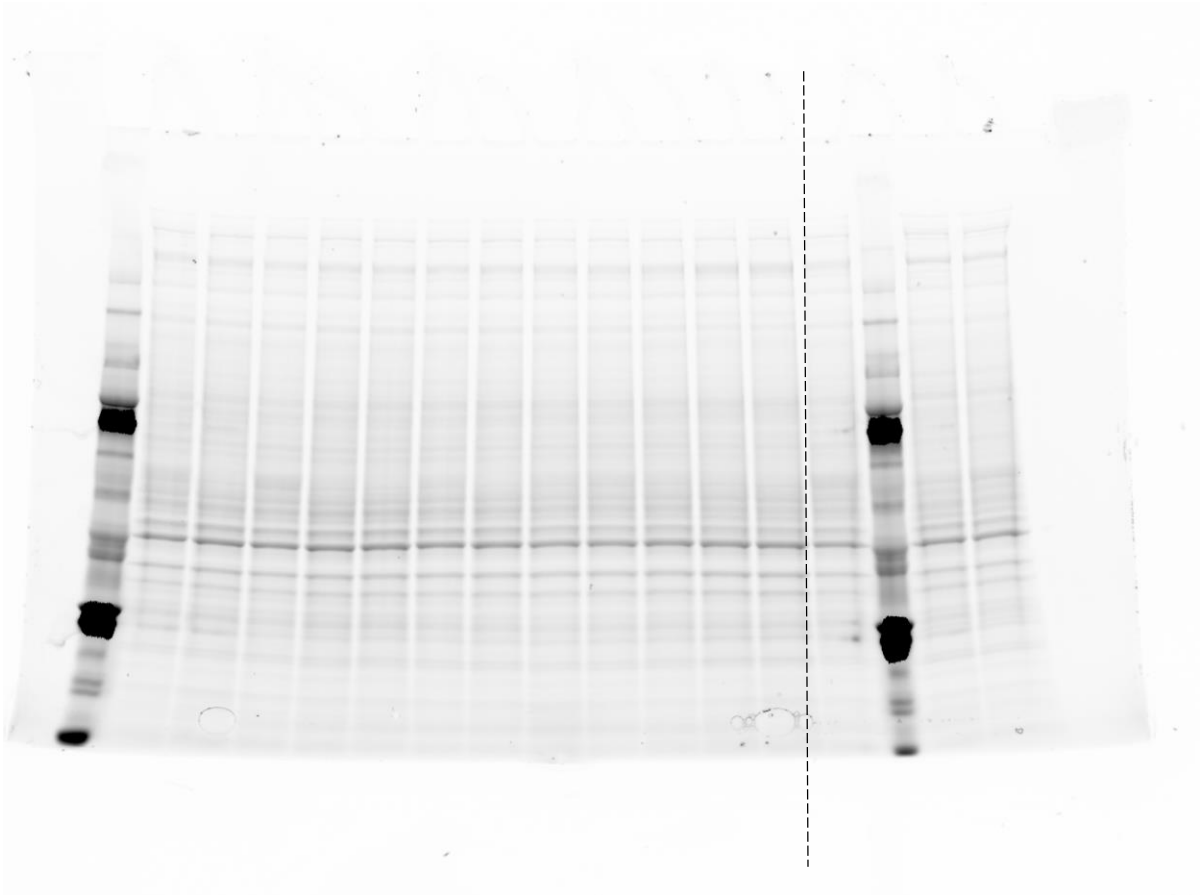

# HMVEC-D

Replicate 1

HIF-3 $\alpha$ 2

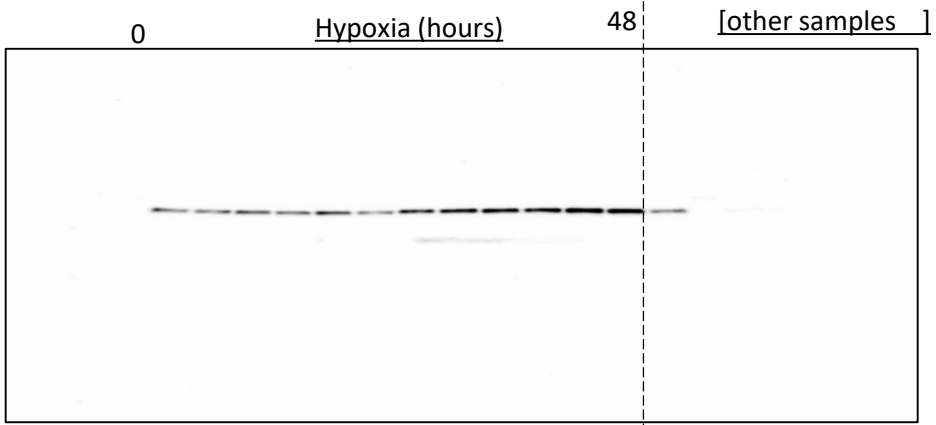

Actin  $\beta$

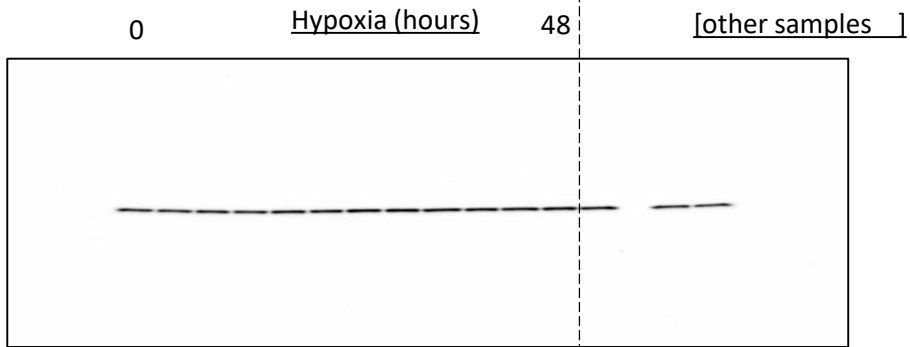

Total Protein

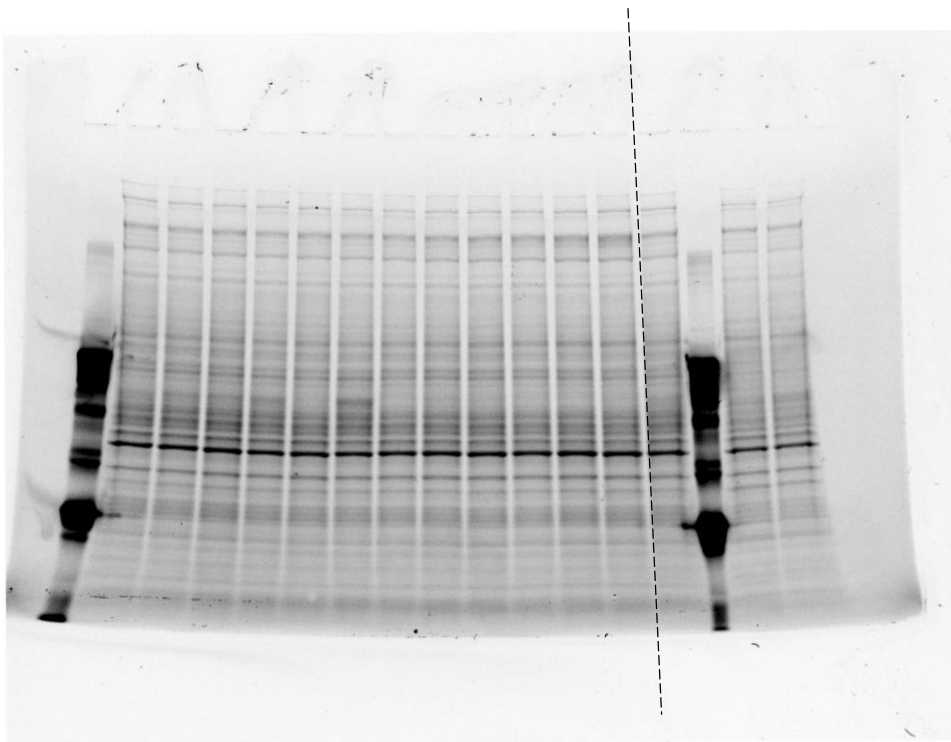

# HMVEC-D

Replicate 2

HIF-3 $\alpha$ 2

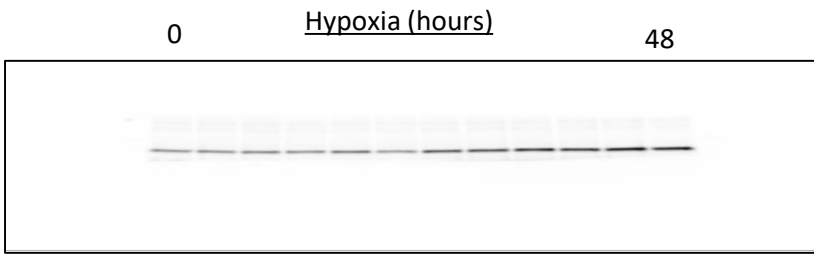

Actin  $\beta$

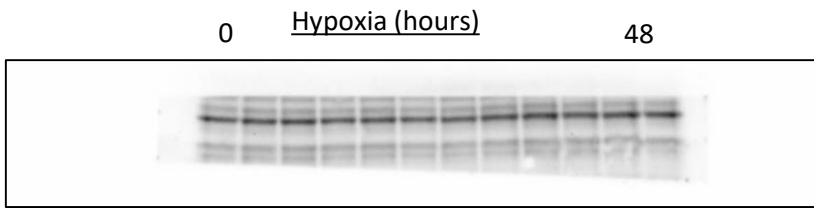

Total Protein

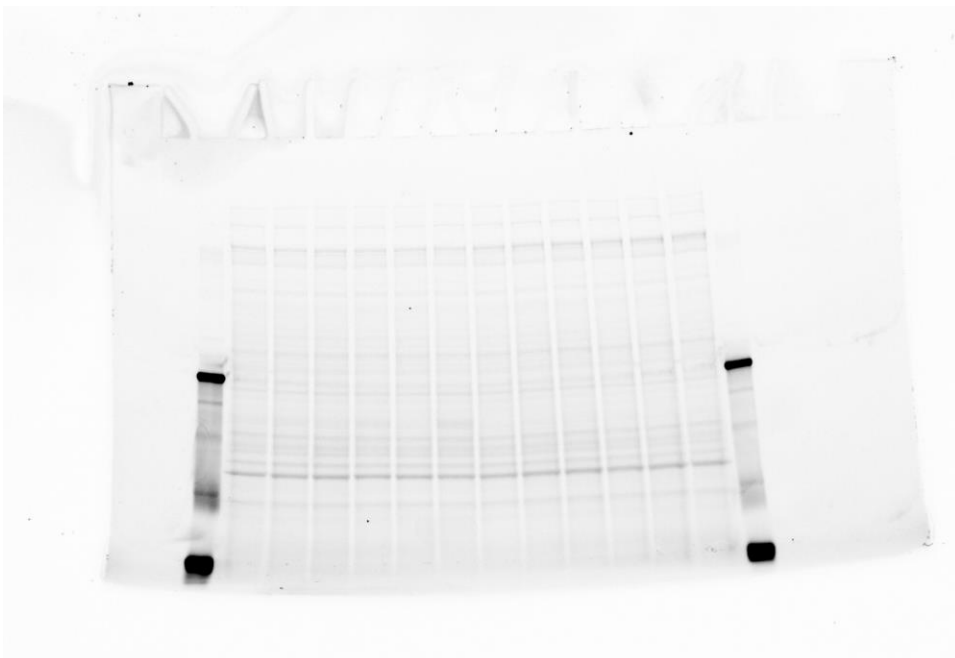

# HMVEC-D

Replicate 3

HIF-3 $\alpha$ 2

0

Hypoxia (hours)

48

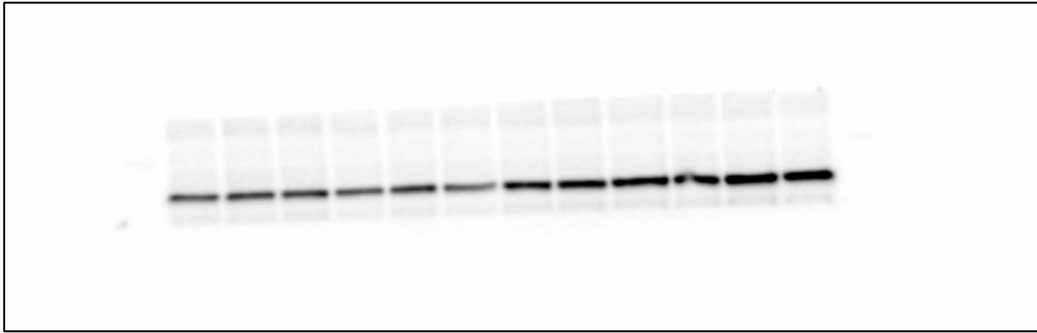

Actin  $\beta$

0

Hypoxia (hours)

48

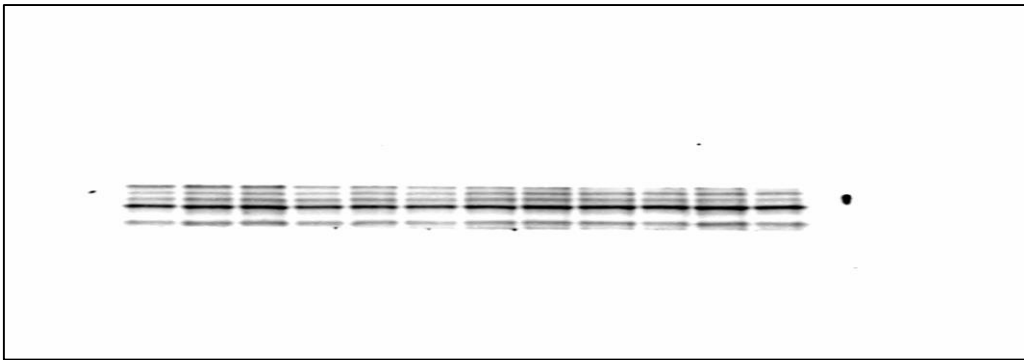

Total Protein

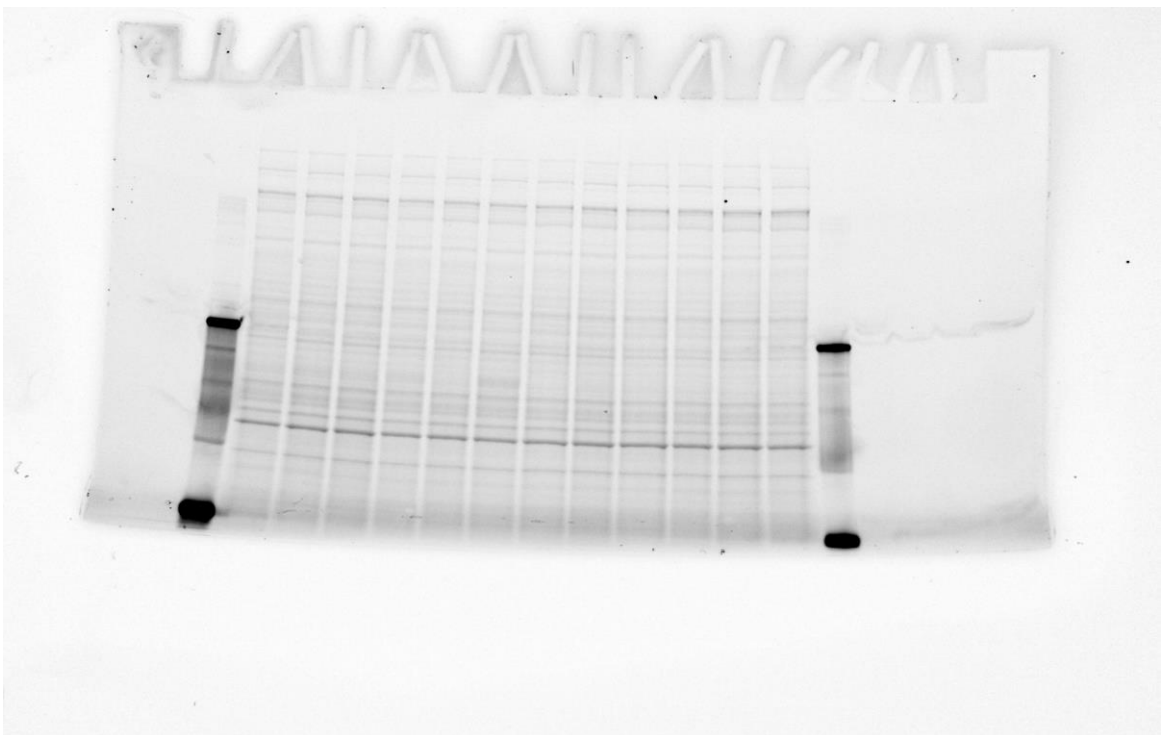

# HMVEC-L

Replicate 1

0      Hypoxia (hours)      48      [other samples ]

HIF-3 $\alpha$ 2

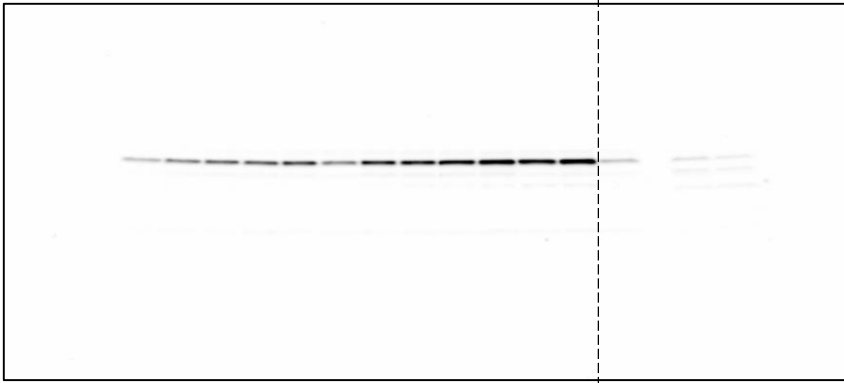

Actin  $\beta$

0      Hypoxia (hours)      48      [other samples ]

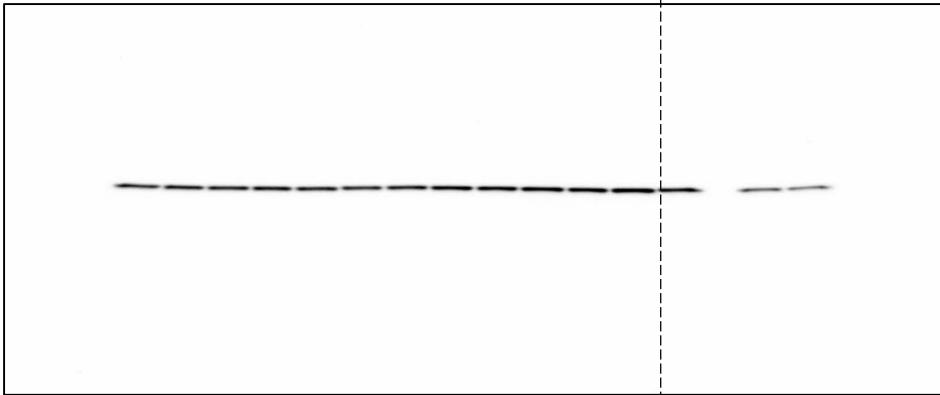

Total Protein

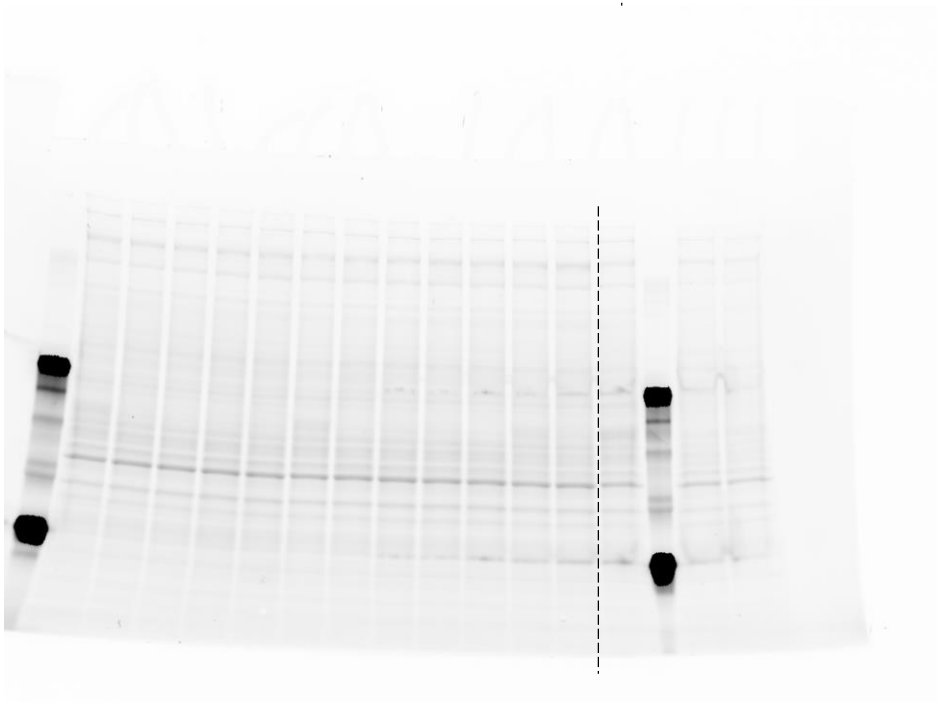

# HMVEC-L

Replicate 2

HIF-3 $\alpha$ 2

0                      Hypoxia (hours)                      48

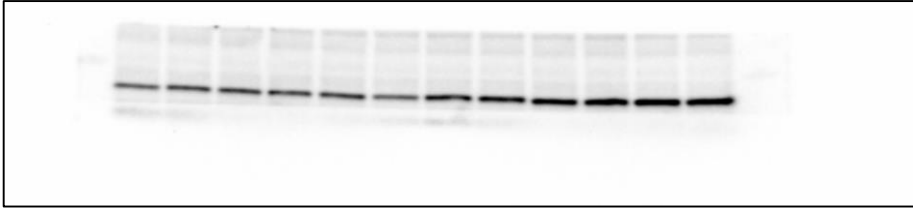

Total Protein

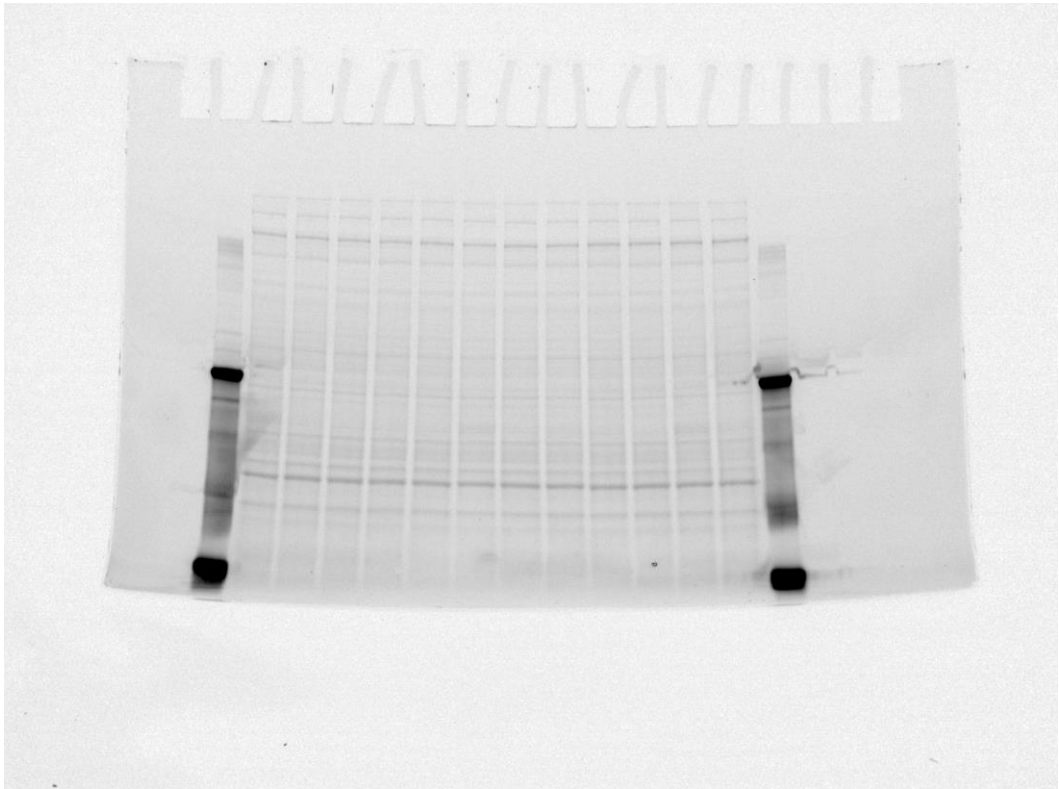



# HMVEC-L

Replicate 3

HIF-3 $\alpha$ 2

0                      Hypoxia (hours)                      48

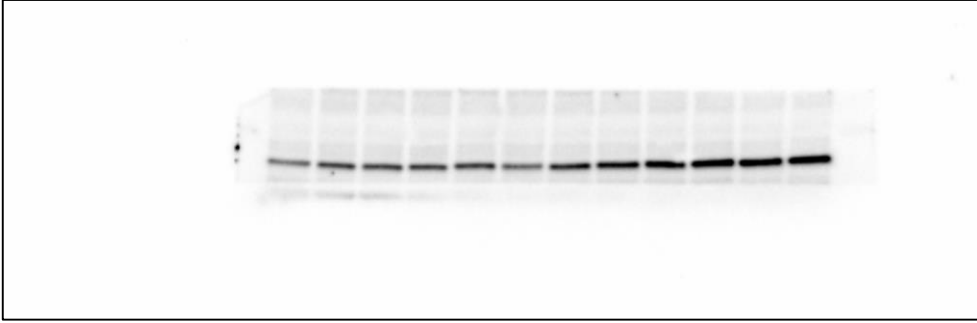

Actin  $\beta$

0                      Hypoxia (hours)                      48

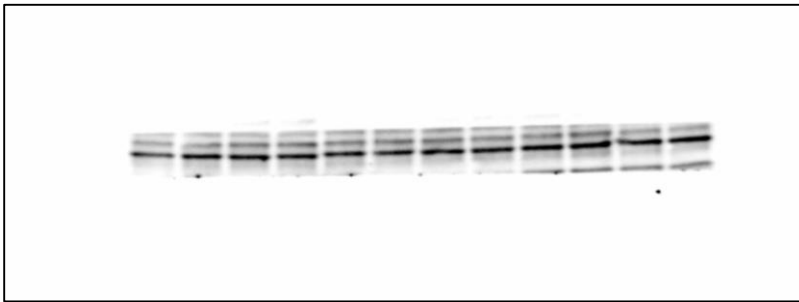

Total Protein

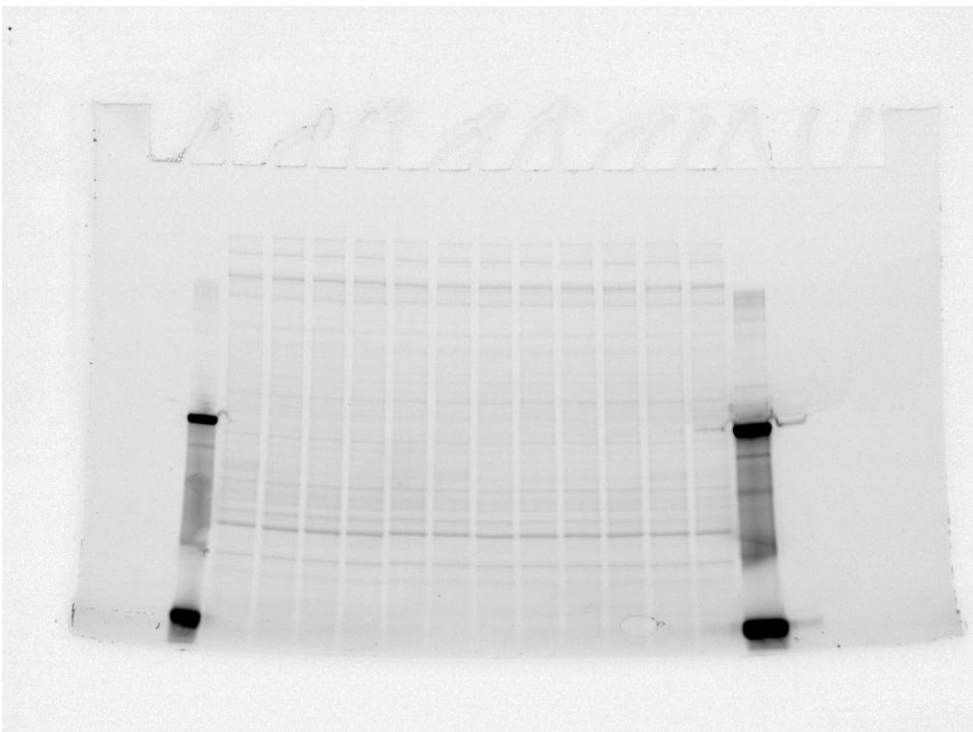

Supplement: EXCLI-21-454-s-001.pdf [file EXCLI-21-454-s-001.pdf]
